1 **Competition and diversity determine vaccine impact on antibiotic resistance**  
2 **evolution**

3

4 Nicholas G. Davies<sup>1\*</sup>, Stefan Flasche<sup>1</sup>, Mark Jit<sup>1,2</sup>, Katherine E. Atkins<sup>1,3</sup>

5

6 1. Centre for Mathematical Modelling of Infectious Diseases; Vaccine Centre; and  
7 Department of Infectious Disease Epidemiology, London School of Hygiene and Tropical  
8 Medicine, London, UK.

9 2. Modelling and Economics Unit, Public Health England, London, UK.

10 3. Centre for Global Health, Usher Institute of Population Health Sciences and  
11 Informatics, The University of Edinburgh, Edinburgh, UK.

12 \* Corresponding author. Address: Department of Infectious Disease Epidemiology,  
13 Faculty of Epidemiology and Population Health, London School of Hygiene and Tropical  
14 Medicine, Keppel Street, London WC1E 7HT, United Kingdom. Phone: +44 20 7927  
15 2880. E-mail: [nicholas.davies@lshtm.ac.uk](mailto:nicholas.davies@lshtm.ac.uk).

16

17 **One sentence summary:** Competition and diversity are key to antibiotic resistance  
18 evolution and determine whether vaccines will prevent or increase resistant infections.

19 **Bacterial vaccines can protect recipients from contracting potentially antibiotic-**  
20 **resistant infections. But by altering the selective balance between sensitive and**  
21 **resistant strains, vaccines may also help suppress—or spread—antibiotic**  
22 **resistance among unvaccinated individuals. Predicting the outcome requires**  
23 **knowing the drivers of resistance evolution. Using mathematical modelling, we**  
24 **identify competition and diversity as key mediators of resistance evolution.**  
25 **Specifically, we show that the frequency of penicillin resistance in *Streptococcus***  
26 ***pneumoniae* (pneumococcus) across 27 European countries can be explained by**  
27 **between-host diversity in antibiotic use, heritable diversity in pneumococcal**  
28 **carriage duration, or within-host competition. We use our calibrated model to**  
29 **predict the impact of universal pneumococcal vaccination upon the prevalence of**  
30 **carriage, incidence of disease, and frequency of resistance for *S. pneumoniae*. The**  
31 **relative strength and directionality of competition between resistant and**  
32 **sensitive pneumococcal strains determines whether vaccination promotes,**  
33 **inhibits, or has little effect on the evolution of antibiotic resistance. Finally, we**  
34 **find that differences in overall bacterial transmission and carriage alter**  
35 **predictions, suggesting that evidence-based policies for managing resistance with**  
36 **vaccines must be tailored to both pathogen and setting.**

37

38 In an age of widespread antibiotic resistance, there is growing interest in using vaccines  
39 to prevent bacterial infections that would otherwise call for treatment with antibiotics  
40 (1–4). This interest arises for two main reasons: first, vaccines are effective against both  
41 antibiotic-resistant and antibiotic-sensitive bacteria; and second, successful prophylaxis  
42 removes the need for a course of antibiotic therapy that might promote more resistance  
43 (2–5). Over the past two decades, the use of pneumococcal conjugate vaccines (PCVs)  
44 has seemingly borne out these advantages. Administering PCVs to young children has  
45 substantially reduced disease caused by *S. pneumoniae* (5–8)—a common asymptomatic  
46 coloniser of the nasopharynx which can cause pneumonia, meningitis and other  
47 infections when invasive—and has decreased demand for antibiotic therapy, largely by  
48 reducing cases of otitis media (5, 9). But because PCV formulations target only a fraction  
49 of the ~100 known pneumococcal serotypes, the niche vacated by PCV-targeted  
50 serotypes has been filled by non-vaccine serotypes, and overall pneumococcal carriage  
51 has rebounded to pre-vaccine levels (10, 11). Concomitantly, the incidence of infections

52 attributed to non-vaccine serotypes (12) and the proportion of non-vaccine-type  
53 infections exhibiting antibiotic resistance (5, 13) have risen in many settings. Concern  
54 over serotype replacement—along with the high cost of PCV manufacturing—has  
55 spurred the development of “universal” whole-cell or protein-based pneumococcal  
56 vaccines protecting against all serotypes, some of which are now in early-stage clinical  
57 trials (14).

58

59 However, it is unclear how universal vaccination may itself impact upon the evolution of  
60 antibiotic resistance in *S. pneumoniae*, which is a concern given that vaccination is  
61 unlikely to eliminate pneumococcal disease (15). Mathematical models can be used to  
62 generate predictions from nonlinear transmission dynamics (16, 17), but existing  
63 models focus on serotype-specific vaccines and, even then, disagree over the expected  
64 impact of vaccination on resistance evolution (18–24). Comparing and interpreting the  
65 results of these models is hampered by the fact that none starts from a position of  
66 recapitulating large-scale empirical patterns of antibiotic resistance. The main challenge  
67 in replicating these patterns lies in identifying the mechanisms that maintain long-term  
68 coexistence between sensitive and resistant pneumococcal strains across a wide range  
69 of antibiotic treatment rates, like those seen across Europe and the United States (25,  
70 26). Robust predictions of the long-term impact of vaccination on resistant  
71 pneumococcal disease require a mechanistic understanding of these patterns.

72

73

## Results

74

75 **Competition and diversity maintain stability in resistance evolution.** A model must  
76 be able to explain the current burden of an infectious disease before it can be used to  
77 robustly predict the impact of interventions for managing that disease. Across Europe,  
78 the frequency of antibiotic resistance among isolates from pneumococcal infections  
79 shows two salient features for models to recapitulate (Supplementary Fig. 1). One is  
80 spatial: the frequency of penicillin non-susceptibility varies between countries, and is  
81 higher in countries where more penicillin is consumed (27). The other is temporal:  
82 although in individual countries resistance fluctuates from year to year, the overall  
83 frequency across Europe of penicillin non-susceptibility in pneumococcal isolates has  
84 remained steady at roughly 12% since consolidated records began in 2005 (28). These

85 observations contradict simple models of resistance evolution, which predict that  
86 intermediate frequencies of resistance cannot be stably maintained in the long term:  
87 that is, either sensitive strains will competitively exclude resistant strains, or resistant  
88 strains will competitively exclude sensitive strains, unless there is some mechanism  
89 maintaining coexistence between them (25, 29).

90

91 By conducting a literature search, we identify nine such mechanisms (25, 26, 30–41)  
92 that fall into two broad classes. In one class, coexistence is maintained by  
93 environmental or genetic diversity that prevents resistant and sensitive strains from  
94 completely overlapping in competition. In the other class, competition between  
95 resistant and sensitive strains is itself the stabilising factor that maintains coexistence,  
96 because resistant and sensitive strains exhibit alternative competitive phenotypes that  
97 afford strains a competitive advantage when rare, thus promoting negative frequency-  
98 dependent selection for resistance. Thus, diversity and competition are two key forces  
99 maintaining stability in resistance evolution. Of the nine identified mechanisms, we find  
100 that four are biologically plausible for maintaining coexistence in *S. pneumoniae* (Table  
101 1).

102

103 **Four models of resistance evolution.** To compare these four mechanisms, we embed  
104 each in a shared model framework of person-to-person transmission of nasopharyngeal  
105 pneumococcal carriage. This framework tracks the country-specific frequency of  
106 resistance in pneumococci circulating among children under five years old, the age  
107 group that drives the majority of pneumococcal transmission and disease (42, 43). We  
108 assume that each individual makes effective contact with another random individual at  
109 rate  $\beta$ , thereby potentially acquiring a strain (either sensitive or resistant) carried by  
110 the contacted person. With probability  $c$ , resistant strains fail to transmit, where  $c$   
111 represents the transmission cost of resistance (44, 45). A carrier naturally clears all  
112 strains at rate  $u$ , and is exposed to antibiotic therapy at a country-specific rate  $\tau$ , which  
113 clears the host of sensitive strains only. We assume this treatment rate is independent  
114 of carriage status (46) and we do not explicitly track disease progression in hosts.

115

116 Under the “Treatment diversity” and “Pathogen diversity” models, coexistence is  
117 maintained because diversity among hosts or among pathogens prevents resistant and

118 sensitive strains from fully overlapping in competition. In the “Treatment diversity”  
119 model (Fig. 1a), heterogeneity in the consumption of antibiotics between host  
120 subpopulations within a country maintains coexistence (25, 34, 35). These  
121 subpopulations could correspond to geographical regions, socioeconomic strata, host  
122 age and risk classes, or a combination of these. Provided that transmission between  
123 high-consumption (resistance-promoting) and low-consumption (resistance-inhibiting)  
124 subpopulations is not too frequent, an intermediate frequency of resistance can be  
125 maintained across the whole population. The key parameters governing coexistence in  
126 this model are  $\kappa$ , the variability in antibiotic consumption between subpopulations, and  
127  $g$ , the relative rate at which within-country contact is made within subpopulations  
128 rather than between them.

129  
130 In the “Pathogen diversity” model (Fig. 1b), pneumococci are divided into subtypes (“D-  
131 types”(38)) that vary in their mean duration of natural carriage. All else equal, the D-  
132 type with the longest carriage duration would be expected to competitively exclude all  
133 other strains; the model assumes that diversifying selection acting on the D-type locus  
134 keeps all subtypes in circulation. What D-types correspond to is not explicitly specified  
135 by this model, but one candidate is serotype variation. For example, if antigenic  
136 diversity is promoted by host acquired immunity to capsular serotypes, and serotypes  
137 tend to differ in their intrinsic ability to evade clearance by the immune system, then  
138 intermediate resistance can be maintained because selection for resistance tends to be  
139 greater in strains that have a longer duration of carriage (38). Long-lasting serotypes  
140 will tend to evolve resistance, while shorter-lived serotypes will tend not to—a pattern  
141 observed in *S. pneumoniae* (38) and reproduced by this model (Supplementary Fig. 2).  
142 The parameters governing coexistence in this model are  $\alpha$ , the strength of diversifying  
143 selection on the D-type locus, and  $\delta$ , the variability between subtypes in clearance rate.

144  
145 Under the “Treatment competition” and “Growth competition” models, coexistence is  
146 maintained because of competition between sensitive and resistant strains. In these  
147 models, hosts can be co-colonised by multiple strains, but which strain a co-colonised  
148 host transmits to other potential hosts is determined by within-host competition  
149 between strains (26). The “Treatment competition” model (Fig. 1c) assumes that  
150 antibiotic therapy mediates within-host competition, such that when a co-colonised

151 host takes antibiotics (*i.e.*, at rate  $\tau$ ), the sensitive strains are cleared and only the  
152 resistant strains are transmitted to other hosts. The “Growth competition” model (Fig.  
153 1d) has both treatment-mediated and growth-mediated competition: while in the  
154 presence of antibiotics, resistant strains still outcompete co-colonising sensitive strains,  
155 in the absence of antibiotics, sensitive strains gradually outcompete co-colonising  
156 resistant strains at rate  $b$ . We assume that there is no transmission cost of resistance in  
157 this latter model (*i.e.*,  $c = 0$ ); instead, the within-host growth advantage  $b$  of sensitive  
158 strains accounts for the cost of resistance. In these competition models, resistant strains  
159 have an advantage in antibiotic-mediated competition, while sensitive strains have an  
160 advantage in growth-mediated competition. These alternative forms of within-host  
161 competition can both promote coexistence because rare strains can more consistently  
162 exploit a competitive advantage over common strains, thus creating negative frequency-  
163 dependent selection for resistance (26). The key parameter governing coexistence in  
164 these two models is  $k$ , the relative rate of co-colonisation compared to primary  
165 colonisation.

166

167 In all four models, we assume that contact between individuals is assortative by  
168 country, such that with probability  $f$ , contact is with a random person from the same  
169 country, and with probability  $1 - f$ , contact is with a random person from any country.  
170 We implement these models using systems of ordinary differential equations. All four  
171 models (25, 26, 38) are structurally neutral (25, 29), meaning that any coexistence  
172 exhibited by the models is accounted for by the specified biological mechanism rather  
173 than by any bias in the logical structure of the model that generates coexistence “for  
174 free”. Additionally, while the within-host competition models capture co-colonisation  
175 using a simplified subset of only 2 “mixed-carriage” states ( $S_R$  and  $R_S$ , Fig. 1a&b), we  
176 have previously shown (26) that this is equivalent to a more complex individual-based  
177 model with an arbitrary number of mixed-carriage states.

178

179 **All four models reproduce observed patterns of resistance.** The European Centre  
180 for Disease Prevention and Control (ECDC) monitors antibiotic consumption and  
181 resistance evolution across European countries (13, 28). These data capture a natural  
182 experiment in resistance evolution: for each monitored drug and pathogen, each  
183 country reports a different rate of antibiotic consumption in the community and

184 exhibits a different frequency of resistance among invasive bacterial isolates. By fitting  
185 models to this multi-country data set, we can potentially rule out models that cannot  
186 reproduce the large-scale patterns that are observed. We use Bayesian inference to fit  
187 the model-predicted equilibrium frequency of resistance to the reported frequency of  
188 penicillin non-susceptibility in *S. pneumoniae* across 27 European countries, assuming a  
189 50% carriage prevalence (11, 42) and a carriage duration of 47 days (47, 48) in children  
190 under five years old. We begin by assuming that countries only differ by their reported  
191 treatment rate—where we define a treatment course as equivalent to  $z = 5$  defined daily  
192 doses of penicillin—with other model parameters shared across countries.

193

194 Strikingly, each model fits equally well to the empirical relationship between resistance  
195 and antibiotic use (all model WAICs are similar; Fig. 2a) and recovers plausible  
196 posterior parameter distributions (Fig. 2b). That is, the empirical data do not  
197 distinguish between the four alternative mechanisms of resistance evolution we have  
198 identified. Later, we relax the assumption that only the treatment rate varies between  
199 countries, allowing us to capture additional between-country variation in resistance not  
200 explained by population-wide penicillin consumption.

201

### 202 **Competition and diversity determine the impact of vaccination on resistant**

203 **disease.** To determine the impact of universal vaccination on pneumococcal disease, we  
204 consider three outcomes. The first is the impact of the vaccine upon the prevalence of  
205 pneumococcal carriage. The second is the vaccine impact upon the frequency of  
206 penicillin resistance among circulating pneumococcal strains remaining after  
207 vaccination. The third is the impact of the vaccine upon the prevalence of resistant  
208 pneumococcal carriage—*i.e.*, the prevalence of carriage multiplied by the frequency of  
209 penicillin resistance. Since all four models are equally capable of recapitulating  
210 observed patterns of penicillin resistance in *S. pneumoniae*, our aim is to determine  
211 whether the mechanism of resistance evolution—competition or diversity—matters  
212 when forecasting the impact of interventions for managing resistance.

213

214 We consider two alternative vaccines: an “acquisition-blocking” vaccine, which prevents  
215 carriage from being established with probability  $\epsilon_a$ , and a “clearance-accelerating”  
216 vaccine, which shortens the duration of carriage by a fraction  $\epsilon_c$ . Both vaccines reduce

217 pneumococcal transmission through alternative modes of host immunity that might be  
218 elicited by a whole-cell or protein-based universal pneumococcal vaccine. Analogously  
219 to naturally-acquired serotype-independent pneumococcal immunity (49), the  
220 protective effect of whole-cell vaccines manifests as accelerated clearance (50); it is  
221 unclear whether protein-based vaccines would block pneumococcal acquisition, like  
222 PCVs, or accelerate clearance (51). We refer to  $\epsilon_a$  or  $\epsilon_c$  as the vaccine efficacy, and for  
223 simplicity, we assume that all children under five years old have vaccine protection, as  
224 would be established by an infant vaccination programme rolled out across Europe. In  
225 order to compare these vaccines with an alternative intervention of antibiotic  
226 stewardship, we also evaluate the impact of reducing the rate of penicillin prescribing  
227 by a fraction  $\epsilon_s$ .

228  
229 We find that both vaccines have a similar impact upon carriage prevalence, regardless  
230 of whether competition or diversity maintains stability in resistance evolution (Fig. 3a).  
231 Specifically, as the vaccine efficacy  $\epsilon_a$  or  $\epsilon_c$  increases, carriage decreases, with the  
232 elimination of pneumococcal carriage occurring at a vaccine efficacy between 50 and  
233 60%. Reducing antibiotic prescribing moderately increases pneumococcal carriage,  
234 such that carriage prevalence increases to approximately 54% across all countries  
235 when penicillin prescribing is eliminated completely.

236  
237 However, the mechanism of resistance evolution has a substantial impact upon whether  
238 vaccines increase or decrease the frequency of resistance in *S. pneumoniae* in the long  
239 term (Fig. 3b). In the “Treatment diversity” and “Pathogen diversity” models, the  
240 acquisition-blocking vaccine has relatively little impact upon the frequency of  
241 resistance, because administering a universal pneumococcal vaccine to all individuals  
242 does not substantially alter the distribution of antibiotic use or of heritable variation in  
243 clearance rates. By contrast, in the within-host competition models, vaccination has a  
244 substantial impact upon resistance evolution because by reducing pneumococcal  
245 circulation, vaccines decrease the rate at which strains encounter each other within  
246 hosts, and hence strongly decrease competition between pneumococcal strains.  
247 Specifically, the acquisition-blocking vaccine selects strongly against resistance in the  
248 “Treatment competition” model: since antibiotic-mediated within-host competition  
249 benefits the resistant strain in this model, the vaccine works against this competitive



250 advantage and therefore inhibits resistance. Conversely, in the “Growth competition”  
251 model, growth-mediated competition benefits the sensitive strain, and so by reducing  
252 competition, vaccination tends to promote resistance. These results expand upon our  
253 previous finding that the rate of co-colonisation modulates resistance evolution through  
254 its impact upon within-host competition (26).

255

256 The clearance-accelerating vaccine exhibits similarly divergent impacts across  
257 mechanisms of resistance evolution. However, compared with the acquisition-blocking  
258 vaccine, it also has an additional resistance-inhibiting effect across all models, because a  
259 shorter duration of carriage—whether natural or vaccine-induced—selects against  
260 resistance (38). This suggests that vaccines that accelerate natural clearance have a  
261 particular potential for managing resistant infections.

262

263 Reducing the rate of penicillin prescribing selects against resistance, as expected,  
264 exhibiting a similar impact across all four models.

265

266 The impact on resistant carriage (Fig. 3c), which combines changes in the prevalence of  
267 carriage and changes in the frequency of resistance, can be treated as a proxy for the  
268 incidence of resistant infections. Overall, under the “Growth competition” model,  
269 vaccination at intermediate efficacy is expected to increase the rate of resistant carriage,  
270 and hence the number of cases of resistant disease. In other models, vaccination always  
271 reduces resistant carriage, particularly under the “Treatment competition” model. A  
272 summary of the strongest vaccine impacts is shown in Fig. 3d.

273

274 **Evidence to inform policy and vaccine trials.** For vaccines to be considered an  
275 efficient means of controlling resistant infections, they must compare favourably to  
276 existing interventions, such as reducing inappropriate antibiotic use (52). The UK  
277 government has recently announced an initiative to reduce antibiotic consumption by  
278 15% by the year 2020 (52). Our models predict that a 15% reduction in primary-care  
279 penicillin consumption would reduce carriage of penicillin-non-susceptible  
280 pneumococci from 6% to 3%. The vaccine efficacy required to yield the same effect  
281 varies considerably depending upon the mechanism of resistance evolution (Fig 4a); for  
282 example, the required vaccine efficacy is lowest under the “Treatment competition”

283 model ( $\epsilon_a = 11\%$ ;  $\epsilon_c = 7\%$ ), and highest under the “Growth competition” model ( $\epsilon_a =$   
284  $52\%$ ;  $\epsilon_c = 50\%$ ). A full comparison of vaccine and stewardship interventions would  
285 require accounting for the economic cost of vaccines versus antibiotics, the wider range  
286 of resistant pathogens that would be targeted by restrictions on antibiotic use, and any  
287 potential increase in pathogen circulation that might be brought about by inadvertent  
288 decreases in appropriate antibiotic use.

289

290 In randomized controlled trials of pneumococcal conjugate vaccines, resistance-related  
291 endpoints have routinely been evaluated over a follow-up period of between 6 months  
292 and 3.5 years after vaccination (53, 54). If vaccine-induced changes in resistance  
293 evolution unfold over a considerably longer timescale, similarly-designed trials may not  
294 appropriately capture vaccine impact on resistance. Indeed, we find that it can take 5–  
295 10 years for the full effects of resistance evolution to be seen (Fig. 4b), and that short-  
296 term drops in resistance can be reversed—or even give way to increased resistance—in  
297 the long term. Moreover, a trial in which vaccination is not offered to a substantial  
298 fraction of the population would not capture the full impact of reduced pneumococcal  
299 circulation, which is what drives competition-mediated changes in resistance in our  
300 models. Finally, our analysis assumes that vaccines are administered to all recipients  
301 simultaneously. In a real-world setting where vaccination would be rolled out gradually,  
302 the full effect of vaccination could take even longer to observe.

303

304 The impact of vaccination at a national level varies depending upon the treatment rate  
305 in a given country. Focusing on the specific outcome of childhood pneumococcal  
306 pneumonia cases, we find that while interventions have a consistent impact from  
307 country to country on the total pneumonia case rate, the impact on resistant pneumonia  
308 cases is greatest in those countries where antibiotic use, and hence resistance, is highest  
309 (Fig. 4c). We focus on resistant carriage, but the realised health benefits of any  
310 intervention targeting both resistant and sensitive strains will depend upon the relative  
311 health burdens of susceptible versus non-susceptible *S. pneumoniae* infections, which is  
312 an area of ongoing research (55).

313

314 **Vaccination in a high-burden setting.** High prevalences of carriage, disease, and  
315 resistance are often observed in low-income settings, and this may substantially alter

316 predictions of vaccine impact. As an illustrative example, a 90% pneumococcal carriage  
317 rate, with 81% of isolates resistant to penicillin, has been observed among children  
318 under five years old in western Kenya (56). This may be partly attributable to a longer  
319 average duration of carriage in this setting, as a 71-day mean duration of natural  
320 pneumococcal carriage has been measured in Kilifi, eastern Kenya (57).

321

322 To model a similar high-burden setting, we adjust model parameters estimated from  
323 European data: increasing the mean natural carriage duration, transmission rate, and  
324 treatment rate to match observed data, and ignoring mixing with any other countries ( $f$   
325 = 1), while keeping other parameters the same. We find that a comparatively greater  
326 vaccine efficacy is needed to reduce the prevalence of resistant carriage in a high-  
327 burden, high-resistance setting (Fig. 5). This is particularly true under the “Growth  
328 competition” model, because in this model resistant carriage only declines as total  
329 pneumococcal carriage declines, and it is particularly difficult to reduce overall carriage  
330 in a high-transmission setting. Simultaneously, vaccination may have a comparatively  
331 greater impact in high-burden settings because of a comparatively higher incidence of  
332 disease: for example, Kenya is estimated to have an 8.8-fold higher incidence of severe  
333 pneumococcal pneumonia than the average in Europe (58).

334

335 **Accounting for additional between-country variation does not substantially alter**  
336 **predictions.** Our focus thus far has been on the impact of the four identified  
337 mechanisms *per se* upon resistance evolution, and accordingly we have focused on  
338 reproducing the positive association between treatment rate and resistance frequency  
339 rather than attempting to capture the additional variability in resistance frequency  
340 between countries not accounted for by the reported treatment rate alone (Fig. 2a). This  
341 additional variability may partially stem from differences in national testing and  
342 reporting practices, or between-country differences in the distribution of pneumococcal  
343 serotypes among invasive isolates (59). However, another possibility is that this  
344 additional variability in resistance results from systematic differences in pathogen  
345 biology or host behaviour across countries which can be captured by our modelling  
346 framework.

347

348 To help identify which model parameters could account for this variability, we relax the  
349 assumption that only the treatment rate varies across countries, and perform Bayesian  
350 maximum *a posteriori* fitting, assuming one additional parameter ( $c$ ,  $b$ ,  $\beta$ ,  $u$ ,  $f$ ,  $z$ ,  $g$ ,  $\kappa$ ,  $a$ ,  $\delta$ ,  
351 or  $k$ ) is free to vary between countries while other parameters are held constant. We  
352 find that additional variation in resistance between countries can be explained by  
353 variation in certain other parameters, depending upon which model is used (Fig. 6a–b).  
354 Importantly, among those parameters for which additional variation between countries  
355 can explain the variation in resistance (Fig. 6c), predictions for the overall impact of  
356 vaccination remain similar with the major differences still attributable to the underlying  
357 mechanism of resistance evolution (Fig. 6d; Supplementary Figs. 3–14). Models that  
358 could make more accurate country-specific predictions would need to account for the  
359 effects of demographic structure, differences in carriage prevalence and disease rates  
360 between settings, and variable vaccine protection among individuals.

361

362

## Discussion

363

364 We have identified four mechanisms of resistance evolution that are capable of  
365 recapitulating the observed relationship between penicillin consumption and penicillin  
366 non-susceptibility in *S. pneumoniae* across Europe. These mechanisms are not mutually  
367 exclusive, but the relative importance of each is predicted to have a substantial impact  
368 upon predictions for resistance evolution under vaccination. In particular, the  
369 “directionality” of within-host competition—that is, whether, on average, within-host  
370 competition tends to benefit resistant or sensitive strains—strongly determines  
371 whether vaccination selects for a decrease or an increase in antibiotic resistance in the  
372 long term. This directionality may vary between pathogens, but is also sensitive to the  
373 antibiotic treatment rate, and so may also vary between settings. Although we have  
374 focused on competition between sensitive and resistant strains of *S. pneumoniae* only,  
375 competition between serotypes (24) and with other bacteria colonizing the  
376 nasopharynx will also impact upon resistance evolution, and determining the  
377 importance of these other sources of within-host competition is crucial.

378

379 A key result of our models is that the mode of vaccine protection—whether acquisition-  
380 blocking or clearance-accelerating—has an appreciable impact upon resistance

381 evolution. Whole-cell and purified-protein pneumococcal vaccines may induce  
382 antibody-mediated humoral immunity, CD4+ T helper-17 cell-mediated immunity, or  
383 both, with the type of immunity mediating pneumococcal acquisition, carriage, and  
384 disease in ways that are still not fully understood (49–51). By modelling both modes of  
385 vaccine action, we have highlighted that clearance-accelerating vaccines have increased  
386 potential for preventing the spread of resistance, because in shortening the duration of  
387 asymptomatic carriage they limit the fitness advantage of resistant pathogens under  
388 selection pressure from antibiotic use.

389

390 The prevalence of penicillin non-susceptibility in *S. pneumoniae* has remained largely  
391 stable in Europe between 2005–2017, a period which saw the incorporation of PCV into  
392 the routine immunization schedules of most European countries (60). However,  
393 because serotype replacement has largely negated any vaccine impact on the  
394 prevalence of nasopharyngeal pneumococcal carriage (10, 11), it is not clear that we  
395 should expect to see any effects of competition-mediated resistance evolution following  
396 a serotype-specific vaccine such as PCV—particularly given the complexity of detecting  
397 vaccine-attributable changes in resistance in a population-level associational study that  
398 would be confounded both by serotype replacement and by other changes in resistance  
399 evolution that might be expected to occur at a national level over the course of multiple  
400 years.

401

402 Under the “Treatment diversity” and “Pathogen diversity” models, we have argued that  
403 universal pneumococcal vaccination will have little impact upon the long-term  
404 evolution of antibiotic resistance because it does not change the sources of diversity  
405 that modulate resistance evolution. Nonetheless, it is possible to target vaccines such  
406 that this diversity is harnessed to manage resistance: high-resistance serotypes could  
407 be targeted with a serotype-specific vaccine, or high-treatment subpopulations could be  
408 targeted for vaccination in order to more effectively manage resistance. Indeed,  
409 vaccination does have an additional inhibiting effect upon resistance in our models  
410 because of the latter effect. This inhibition occurs because the vaccine has a relatively  
411 greater impact upon transmission in populations where the prevalence of carriage is  
412 already low, which in our models occur in countries or subpopulations with more  
413 antibiotic consumption. Since these populations drive resistance more strongly, the

414 vaccine's comparatively greater impact in these populations tends to moderately inhibit  
415 resistance overall. We note that while previous work (38) has suggested that resistance  
416 evolution under a "Pathogen diversity" model results in a "stepped" resistance pattern  
417 in which D-types are either fully sensitive or fully resistant at equilibrium, we find that  
418 small amounts of mixing between populations can smooth out this pattern and allow  
419 intermediate rates of resistance within subtypes (Supplementary Fig. 2). Finally, while  
420 we have framed "Treatment competition" and "Growth competition" as two distinct  
421 alternatives, they can instead be viewed as endpoints on a continuum, with possible  
422 models of resistance evolution for which both  $c > 0$  and  $b > 0$  lying between them. The  
423 impact of vaccination on resistance in such a model would depend upon the relative  
424 importance of treatment-mediated and growth-mediated competition.

425

426 This analysis has necessarily made simplifying assumptions. We have focused on  
427 prevalence (the fraction of individuals who are carriers) rather than incidence (the rate  
428 of new carriage episodes) of nasopharyngeal carriage in presenting our findings. There  
429 is evidence that pneumococcal disease progression is more likely to occur shortly after  
430 nasopharyngeal acquisition (61), suggesting that incidence may be more relevant than  
431 prevalence for predicting disease outcomes. Of particular note, recent modelling work  
432 has suggested that clearance-accelerating vaccines can increase rates of pneumococcal  
433 acquisition, if extended carriage is protective against new acquisition (62). However, it  
434 is not obvious how to compare rates of carriage acquisition across the models examined  
435 in this paper, particularly because co-colonisation is explicitly tracked—and fitted to  
436 data—in some but not all models. More work is required to clarify the links between  
437 acquisition, carriage, and disease across competing models of pneumococcal  
438 transmission. Additionally, we have assumed that antibiotic treatment rates among  
439 pneumococcal carriers remains constant after the introduction of a vaccine, even  
440 though treatment rates dropped in many settings following PCV introduction (5, 9).  
441 However, for a universal pneumococcal vaccine that reduces antibiotic treatment rates  
442 because it reduces carriage and thereby prevents antibiotic-treatable disease, any  
443 reduction in treatment will only occur among individuals who, because of vaccine  
444 protection, are not pneumococcal carriers, all else being equal. It might then be  
445 expected that treatment rates in carriers would remain equally high among those  
446 individuals for whom vaccine protection has failed.

447

448 Our work helps resolve the question: What explains the persistent coexistence between  
449 resistant and sensitive strains of *S. pneumoniae*? (25) by demonstrating that multiple  
450 mechanisms are capable of explaining trends of resistance across European countries.  
451 Since there is empirical support for within-host competition between sensitive and  
452 resistant pathogen strains (63–66), heritable differences in the propensity for resistance  
453 within species (38), and within-country heterogeneity in antibiotic consumption rates  
454 (67–69), all of these mechanisms likely contribute to this pattern. Our results  
455 contextualize previous mathematical studies which have variously suggested that  
456 serotype-specific vaccination may increase (24), decrease (22) or have no impact upon  
457 (18) the frequency of resistance in *S. pneumoniae*. While the potential for vaccination to  
458 promote resistance because of competition between sensitive and resistant strains has  
459 been described previously (24), we have shown that vaccination can either promote or  
460 inhibit resistance depending upon the directionality of within-host competition. While  
461 vaccines targeting highly-resistant serotypes can decrease resistance (22), we have  
462 shown that a serotype-independent vaccine promoting accelerated natural clearance  
463 can decrease resistance across all circulating subtypes. And where single-population  
464 models have found no long-term impact of vaccination on resistance frequency (18), we  
465 have shown that in multi-population models, vaccination can inhibit resistance if it has  
466 a larger impact in subpopulations that consume more antibiotics. The direction and  
467 magnitude of this effect would depend upon variation in vaccine uptake, vaccine  
468 efficacy, and pathogen transmission among subpopulations, and we have not  
469 systematically explored this variation here.

470

471 A highly efficacious serotype-independent pneumococcal vaccine can indeed reduce the  
472 overall burden of antibiotic-resistant pneumococcal infections. However, the long-term  
473 effect upon resistance of a vaccine with intermediate efficacy is less certain, as vaccine  
474 impact depends crucially upon the mechanisms that drive resistance evolution. Thus,  
475 empirical investigation of pathogen competitive dynamics—and the impact of setting-  
476 specific factors on these dynamics—is needed to make accurate predictions of vaccine  
477 impact on resistant infections.

478

479

## Methods

480

481 *Study design.* This study comprises four parts: a literature search used to identify  
482 plausible mechanisms through which coexistence can be maintained between sensitive  
483 and resistant pneumococcal strains across a range of antibiotic treatment rates; a  
484 mathematical modelling study embedding these mechanisms of resistance evolution in  
485 four models of pneumococcal transmission; a Bayesian statistical analysis to fit these  
486 models to empirically observed frequencies of penicillin non-susceptibility and  
487 community penicillin consumption across 27 European countries for the year 2007; and  
488 a vaccine impact analysis using these fitted models to forecast the impact of a universal  
489 pneumococcal vaccine. We use data from 2007 because changes in pneumococcal  
490 resistance reporting standards for some countries after this year hamper the between-  
491 country comparability of data (70). Our objectives were to identify the mechanisms  
492 potentially responsible for maintaining coexistence between resistant and sensitive  
493 pneumococci in Europe, and to determine whether the impact of vaccination on the  
494 evolution of resistance depends upon which mechanism is assumed to operate.

495

496 *Mechanisms driving resistance.* We searched PubMed using the terms: (AMR OR ABR OR  
497 ((antimicrobial OR antibiotic) AND resist\*)) AND ((model OR modelling OR modeling)  
498 AND (dynamic\* OR transmi\* OR mathematical)) AND (coexist\* OR intermediate). This  
499 yielded 93 papers (Supplementary Table 1). We included all papers containing a  
500 dynamic host-to-host pathogen transmission model analysing both sensitive and  
501 resistant strains with stable coexistence as an outcome of the model. From the 11  
502 studies meeting these criteria, we identified nine unique mechanisms, two of which  
503 correspond to alternative parameterisations of a within-host competition model. We  
504 ruled out four mechanisms because of implausibility or because previous work shows  
505 that the mechanism does not bring about substantial coexistence, leaving four  
506 mechanisms (Table 1).

507

508 *Model framework.* We analyse the evolution of antibiotic resistance by tracking the  
509 transmission of resistant and sensitive bacterial strains among hosts in a set of  $M$   
510 countries indexed by  $m \in \{1, 2, \dots, M\}$  using systems of ordinary differential equations.

511



512 In a simple model, hosts can either be non-carriers ( $X$ ), carriers of the sensitive strain  
513 ( $S$ ), or carriers of the resistant strain ( $R$ ). Omitting country-specific subscripts  $m$  for  
514 concision, model dynamics within a country are captured by

$$\begin{aligned} 515 & \\ 516 & \quad dS/dt = \lambda_S X - (u + \tau)S \\ 517 & \quad dR/dt = (1 - c)\lambda_R X - uR \\ 518 & \quad X = 1 - S - R, \end{aligned} \tag{1}$$

519  
520 where  $\lambda_S$  is the force of infection of the sensitive strain,  $\lambda_R$  is the force of infection of the  
521 resistant strain,  $c$  is the transmission cost of resistance,  $u$  is the rate of natural  
522 clearance, and  $\tau$  is the treatment rate. In this model, in a given country, the total  
523 carriage of the sensitive strain is  $S$  and the total carriage of the resistant strain is  $R$ .  
524 Force of infection terms are defined below.

525  
526 The “Treatment diversity” model extends the simple model (eq. 1) by structuring each  
527 country into multiple subpopulations that exhibit different rates of antibiotic treatment  
528 and make contact with each other at unequal rates (25, 34, 35, 71). In each country, we  
529 model  $N$  equally-sized representative subpopulations indexed by  $i \in \{1, 2, \dots, N\}$ , where  
530 we assume  $N = 10$ . Dynamics within a country are

$$\begin{aligned} 531 & \\ 532 & \quad dS_i/dt = \lambda_{S,i} X - (u + \tau_i)S \\ 533 & \quad dR_i/dt = (1 - c)\lambda_{R,i} X - uR \\ 534 & \quad X_i = 1 - S_i - R_i \end{aligned} \tag{2}$$

535  
536 where we assume that treatment rates of subpopulations within a country  
537 approximately follow a gamma distribution with shape parameter  $\kappa$  and mean  
538 treatment rate  $\tau$ . Accordingly, the rate of antibiotic consumption in subpopulation  $i$  is

$$539 \quad \tau_i = \int_{Q_\Gamma\left(\frac{i-1}{N}|\kappa\right)}^{Q_\Gamma\left(\frac{i}{N}|\kappa\right)} t P_\Gamma(t|\kappa) dt, \text{ where } Q_\Gamma(q|\kappa) \text{ is the quantile } q \text{ of the gamma distribution}$$

540 with shape  $\kappa$  and  $P_\Gamma(t|\kappa)$  is the probability density at  $t$  of the same gamma distribution.

541  
542 The “Pathogen diversity” model extends the simple model (eq. 1) by structuring the  
543 pathogen population into  $D$  different “D-types” (we assume  $D = 25$ ), each with a

544 different natural clearance rate, where each type is kept circulating by diversifying  
 545 selection acting on D-type (38). Dynamics within a country are

546

$$547 \quad dS_d/dt = q_d \lambda_{S,d} X - (u_d + \tau) S_d$$

$$548 \quad dR_d/dt = q_d (1 - c) \lambda_{R,d} X - u_d R_d$$

$$549 \quad X = 1 - \sum_d (S_d + R_d) \quad (3)$$

550

551 where  $q_d = (1 - \frac{S_d + R_d}{\sum_{j=1}^D (S_j + R_j)} + \frac{1}{D})^a$  is the strength of diversifying selection for D-type  $d \in$

552  $\{1, 2, \dots, D\}$  and  $u_d = u \left(1 + \delta \left(2 \frac{d-1}{D-1} - 1\right)\right)$  is the clearance rate for D-type  $d$ , where

553 model parameter  $a$  is the power of diversifying selection and model parameter  $\delta$  is the

554 range of clearance rates (38). In a given country, the total carriage of the type- $d$

555 sensitive strain is  $S_d$  and the total carriage of the type- $d$  resistant strain is  $R_d$ .

556

557 Finally, the within-host competition models (26) allow hosts to carry a mix of both

558 strains. Hosts can carry the sensitive strain with a small complement of the resistant

559 strain ( $S_R$ ) or the resistant strain with a small complement of the sensitive strain ( $R_S$ ).

560 Dynamics within a country are

561

$$562 \quad dS/dt = \lambda_S X - (u + \tau) S - k(1 - c) \lambda_R S + b_0 S_R$$

$$563 \quad dS_R/dt = k(1 - c) \lambda_R S - (u + \tau) S_R + b R_S - b_0 S_R$$

$$564 \quad dR_S/dt = k \lambda_S R - (u + \tau) R_S - b R_S$$

$$565 \quad dR/dt = (1 - c) \lambda_R X - u R - k \lambda_S R + \tau (S_R + R_S)$$

$$566 \quad X = 1 - S - R - S_R - R_S, \quad (4)$$

567

568 where  $k$  is the rate of co-colonisation relative to primary colonisation,  $b$  is the within-

569 host growth benefit of sensitivity (i.e. the rate of the  $R_S \rightarrow S_R$  transition), and  $b_0 = 4b$  is

570 the rate of the  $S_R \rightarrow S$  transition as a function of this growth benefit. In a given country,

571 the total carriage of the sensitive strain is  $S + S_R$  and the total carriage of the resistant

572 strain is  $R + R_S$ . "Treatment competition" assumes the cost of resistance is incurred by

573 reduced transmission potential ( $b = 0$  and  $c > 0$ ), while "Growth competition" assumes

574 that the cost of resistance is incurred through decreased within-host growth ( $b > 0$  and

575  $c = 0$ ).

576

577 In equations 1, 3 and 4, the force of infection of a particular strain  $A$  in country  $m$  is  $\lambda_A =$   
578  $\beta(fA_{\text{tot}|m} + (1 - f) \sum_{\ell=1}^M h_{\ell} A_{\text{tot}|\ell})$ , where  $\beta$  is the transmission rate,  $f$  is the between-  
579 country assortativity,  $h_{\ell}$  is the relative population size of country  $m$  (such that  $\sum_{\ell} h_{\ell} =$   
580 1), and  $A_{\text{tot}|\ell}$  is the total carriage of strain  $A$  in country  $\ell$ . The probability with which  
581 individuals contact an individual from another country,  $1 - f$ , captures those contacts  
582 made with individuals from another country in either one's home country or a foreign  
583 country. In equation 2, the force of infection of a particular strain  $A$  in subpopulation  $i$  of  
584 country  $m$  is  $\lambda_{A,i} = \beta \left( f \left( gA_{\text{tot}|m,i} + (1 - g) \sum_{j=1}^N \frac{1}{N} A_{\text{tot}|m,j} \right) + (1 - \right.$   
585  $\left. f) \sum_{\ell=1}^M \sum_{j=1}^N \frac{h_{\ell}}{N} A_{\text{tot}|\ell,j} \right)$ , where  $g$  is the within-country assortativity and  $A_{\text{tot}|\ell,j}$  is the  
586 total carriage of strain  $A$  in subpopulation  $j$  of country  $\ell$ .

587

588 *Data and model fitting.* We extracted community penicillin consumption and penicillin  
589 non-susceptibility in *S. pneumoniae* invasive isolates from databases made available by  
590 the ECDC (13, 28). We assume that community penicillin consumption drives penicillin  
591 resistance, that antibiotic consumption is independent of whether an individual is  
592 colonised by pneumococcus, and that resistance among invasive bacterial isolates is  
593 representative of resistance among circulating strains more broadly. Countries report  
594 community penicillin consumption in defined daily doses (DDD) per thousand  
595 individuals per day. To transform this bulk consumption rate into the rate at which  
596 individuals undertake a course of antibiotic therapy, we analysed prescribing data from  
597 eight European countries, estimating that, on average, 5 DDD in the population at large  
598 correspond to one treatment course for a child under 5 years of age. This conversion  
599 rate varies between countries (Supplementary Table 4), but since the data are  
600 incomplete (8 of 27 countries) we have not explicitly accounted for this variability in  
601 our main model fitting results.

602

603 Our model framework tracks carriage of *S. pneumoniae* among children aged 0–5 years,  
604 the age group driving both transmission and disease. In European countries, we assume  
605 that the prevalence of pneumococcal carriage in under-5s is 50% (11, 42) and the  
606 average duration of carriage is 47 days (47, 48). We calculate the average incidence of *S.*  
607 *pneumoniae*-caused severe pneumonia requiring hospitalisation as 610 per million

608 children under 5 per year (58) across the European countries in our data set. See  
 609 Supplementary Tables 3, 5, and 6 for details of calculations relating to pneumococcal  
 610 carriage duration and disease incidence.

611  
 612 We use Bayesian inference via differential evolution Markov chain Monte Carlo (72) to  
 613 identify model parameters that are consistent with empirical data. Country  $m$  has  
 614 antibiotic treatment rate  $\tau_m$  and reports  $r_m$  of  $n_m$  isolates are resistant. Over all  $M$   
 615 countries, these data are denoted  $\tau = (\tau_1, \tau_2, \dots, \tau_M)$ ,  $r = (r_1, r_2, \dots, r_M)$ , and  $n =$   
 616  $(n_1, n_2, \dots, n_M)$ , respectively. The probability of a given set of model parameters  $\theta$  is  
 617 then

$$P(\theta|\tau, r, n) \propto P(\tau, r, n|\theta)P(\theta),$$

618  
 619  
 620 where  $P(\theta)$  is the prior probability of parameters  $\theta$  and

$$P(\tau, r, n|\theta) = C(Y = Y(\tau|\theta)) \prod_{m=1}^M R(r = r_m, n = n_m, \rho = \rho(\tau_m|\theta))^{N_m/\bar{N}}$$

621  
 622  
 623 is the likelihood of data  $\tau, r, n$  given model parameters  $\theta$ . Above,  $Y(\theta)$  is the average  
 624 model-predicted prevalence of carriage across all countries and  $\rho(\tau_m|\theta)$  is the model-  
 625 predicted resistance prevalence for country  $m$ .  $C(Y)$  is the credibility of prevalence of  
 626 carriage  $Y$  and  $R(r, n, \rho)$  is the credibility of  $r$  out of  $n$  isolates being resistant when the  
 627 model-predicted resistance prevalence is  $\rho$ . For  $C(Y)$ , we use a normal distribution with  
 628 mean 0.5 and standard deviation 0.002. For  $R(r, n, \rho)$ , we use  $R(r, n, \rho) =$

629  $\int_0^1 T(x|\mu = \rho, \sigma = \sigma(\theta)) \binom{n}{r} x^r (1-x)^{n-r} dx$ , a binomial distribution where the  
 630 probability of success is modelled as a [0,1]-truncated normal distribution centred on  $\rho$   
 631 and with standard deviation  $\sigma$ . The parameter  $\sigma$  captures the unexplained between-  
 632 country variation in resistance frequency. Here,  $T(x|\mu, \sigma) = \frac{\varphi(x|\mu, \sigma)}{(\Phi(1|\mu, \sigma) - \Phi(0|\mu, \sigma))}$ , where

633  $\varphi(\mu, \sigma) = \frac{1}{\sqrt{2\pi\sigma^2}} \exp\left(-\frac{(x-\mu)^2}{2\sigma^2}\right)$  is the untruncated normal PDF and  $\Phi(\mu, \sigma) = \frac{1}{2} \left(1 + \operatorname{erf}\left(\frac{x-\mu}{\sigma\sqrt{2}}\right)\right)$   
 634 is the untruncated normal cumulative distribution function. Finally,  $N_m$  is the  
 635 population size of country  $m$  and  $\bar{N}$  is the average population size across all countries;  
 636 the exponent  $N_m/\bar{N}$  allows us to weight the importance of each country by its

637 population size, which allows a closer fit with the overall resistance prevalence across  
638 all countries.

639

640 We adopt  $c \sim \text{Beta}(\alpha = 1.5, \beta = 8.5)$ ,  $b \sim \text{Gamma}(\kappa = 2, \theta = 0.5)$ ,  $\beta \sim \text{Gamma}(\kappa =$   
641  $5, \theta = 0.35)$ ,  $g \sim \text{Beta}(\alpha = 10, \beta = 1.5)$ ,  $\kappa \sim \text{Gamma}(\kappa = 4, \theta = 2)$ ,  $a \sim \text{Gamma}(\kappa =$   
642  $2, \theta = 5)$ ,  $\delta \sim \text{Beta}(\alpha = 20, \beta = 25)$ , and  $k \sim \text{Normal}(\mu = 1, \sigma = 0.5)$  as weakly  
643 informative prior distributions for model fitting. We set the unexplained between-  
644 country variation in resistance prevalence  $\sigma$  to 0.06 across all models based on a  
645 preliminary round of model fitting with  $\sigma$  as a free parameter, and set the between-  
646 country assortativity  $f$  to 0.985 (*i.e.*, 1.5% of contacts occur with individuals from a  
647 different country) based on rates of travel within the EU. See Supplementary Table 7 for  
648 MCMC diagnostics.

649

650 To match model predictions to a high-burden setting, we increase the duration of  
651 carriage to 71.4 days; increase the transmission rate by a factor of 3.49 (Treatment  
652 diversity), 3.62 (Pathogen diversity), 3.61 (Treatment competition), or 3.20 (Growth  
653 competition), so that carriage prevalence reaches 90.0%; and increase the antibiotic  
654 consumption rate to 1.670, 1.458, 1.138, or 5.887 courses per person per year,  
655 respectively, so that resistance prevalence reaches 81.4%.

656

657 *Interventions.* Interventions have the following impact on model parameters: for the  
658 acquisition-blocking vaccine, the transmission rate becomes  $\beta' = (1 - \varepsilon_a) \beta$ ; for the  
659 clearance-accelerating vaccine, the clearance rate becomes  $u' = u / (1 - \varepsilon_c)$ ; and under  
660 antibiotic stewardship, the average treatment rate in each country  $m$  becomes  $\tau_m' = \tau_m$   
661  $(1 - \varepsilon_s)$ .

662

663 *Capturing additional between-country variation in resistance frequency.* We begin by  
664 finding the maximum *a posteriori* model fits according to the likelihood and prior  
665 distributions for each of the four models of resistance evolution. This identifies the  
666 following parameter values for each model. “Treatment diversity”:  $\beta = 1.41$ ,  $c = 0.124$ ,  $g$   
667  $= 0.976$ , and  $\kappa = 2.22$ . “Pathogen diversity”:  $\beta = 1.33$ ,  $c = 0.191$ ,  $a = 10.8$ , and  $\delta = 0.608$ .  
668 “Treatment competition”:  $\beta = 1.42$ ,  $c = 0.191$ , and  $k = 1.64$ . “Growth competition”:  $\beta =$   
669  $1.39$ ,  $b = 0.195$ , and  $k = 1.61$ . Then, we perform maximum *a posteriori* model fits for each

670 potentially-varying parameter under each model, allowing the varying parameter to  
671 take on a different value for each country and fixing other parameters at their maximum  
672 *a posteriori* values as determined in the previous step, or at specific assumed values for  
673  $u = 0.65$ ,  $f = 0.985$ , and  $z = 5$ . For the second step, we use a modified likelihood function

674

$$675 \quad P(\tau, r, n|\theta) = C(Y = Y(\tau|\theta)) \prod_{m=1}^M \phi \left( \mu = \frac{r_m + 1}{n_m + 2}, \sigma = 0.001 \mid x = \rho(\tau_m|\theta) \right)^{N_m/\bar{N}},$$

676

677 where  $\phi(\mu, \sigma|x)$  is the normal probability density function. This modified likelihood  
678 function ensures that the model-predicted resistance frequency for each country is  
679 matched as closely as possible to the maximum-likelihood resistance prevalence  $\frac{r_m + 1}{n_m + 2}$   
680 (*i.e.*, assuming a uniform prior on resistance frequency) for each country  $m$ , so that  
681 model fits are comparable across different varying parameters. We use the Nelder-Mead  
682 algorithm to maximize the posterior probability in both steps.

683

684 Supplementary Figs. 3–6 show maximum *a posteriori* fits when allowing an additional  
685 parameter to vary freely between countries, along with the parameter values identified  
686 by model fitting. Supplementary Figs. 7–10 show the impact of vaccination, focusing on  
687 those parameters for which model fitting was able to capture the observed variability in  
688 resistance frequency between countries (*i.e.*, those parameters plotted to the left of the  
689 dashed line in Fig. 6b of the main text). Supplementary Figs. 11–14 show the impact of  
690 vaccination for the remaining parameters.

691 **List of Supplementary Materials**

692

693 **Supplementary Table 1.** Literature review.

694 **Supplementary Table 2.** Summary of model parameters.

695 **Supplementary Table 3.** Carriage duration.

696 **Supplementary Table 4.** Penicillin consumption.

697 **Supplementary Table 5.** Pneumococcal morbidity.

698 **Supplementary Table 6.** Carriage duration (Kilifi).

699 **Supplementary Table 7.** MCMC diagnostics.

700 **Supplementary Fig. 1.** Patterns of penicillin non-susceptibility across European  
701 countries, 2005–2017.

702 **Supplementary Fig. 2.** Carriage and resistance of D-types in “Pathogen variability”  
703 model.

704 **Supplementary Fig. 3.** Varying-parameter fits for “Treatment diversity” model.

705 **Supplementary Fig. 4.** Varying-parameter fits for “Pathogen diversity” model.

706 **Supplementary Fig. 5.** Varying-parameter fits for “Treatment competition” model.

707 **Supplementary Fig. 6.** Varying-parameter fits for “Growth competition” model.

708 **Supplementary Fig. 7.** Vaccine impact for “Treatment diversity” model, varying  
709 parameters  $c$  and  $z$ .

710 **Supplementary Fig. 8.** Vaccine impact for “Pathogen diversity” model, varying  
711 parameters  $c$ ,  $\delta$ , and  $z$ .

712 **Supplementary Fig. 9.** Vaccine impact for “Treatment competition” model, varying  
713 parameters  $\beta$ ,  $c$ ,  $u$ ,  $k$ , and  $z$ .

714 **Supplementary Fig. 10.** Vaccine impact for “Growth competition” model, varying  
715 parameters  $b$  and  $z$ .

716 **Supplementary Fig. 11.** Vaccine impact for “Treatment diversity” model, varying other  
717 parameters.

718 **Supplementary Fig. 12.** Vaccine impact for “Pathogen diversity” model, varying other  
719 parameters.

720 **Supplementary Fig. 13.** Vaccine impact for “Treatment competition” model, varying  
721 other parameters.

722 **Supplementary Fig. 14.** Vaccine impact for “Growth competition” model, varying other  
723 parameters.

724  
725  
726  
727  
728  
729  
730  
731  
732  
733  
734  
735  
736  
737  
738  
739  
740  
741  
742  
743  
744  
745  
746  
747  
748  
749  
750  
751  
752  
753  
754  
755  
756

## References

1. J. O’Neill, “Vaccines and alternative approaches: reducing our dependence on antimicrobials” (2016), (available at [http://amr-review.org/sites/default/files/Vaccines and alternatives\\_v4\\_LR.pdf](http://amr-review.org/sites/default/files/Vaccines%20and%20alternatives_v4_LR.pdf)).
2. M. Lipsitch, R. Siber, How Can Vaccines Contribute to Solving the Antimicrobial Resistance Problem ? *7*, 1–8 (2016).
3. K. E. Atkins, M. Lipsitch, Can antibiotic resistance be reduced by vaccinating against respiratory disease? *Lancet Respir. Med.* **6**, 820–821 (2018).
4. J. P. Sevilla, D. E. Bloom, D. Cadarette, M. Jit, M. Lipsitch, Toward economic evaluation of the value of vaccines and other health technologies in addressing AMR. *Proc. Natl. Acad. Sci.* **115**, 12911–12919 (2018).
5. K. P. Klugman, S. Black, Impact of existing vaccines in reducing antibiotic resistance: Primary and secondary effects. *Proc. Natl. Acad. Sci.* **115**, 12896–12901 (2018).
6. M. H. Kyaw, R. Lynfield, W. Schaffner, A. S. Craig, J. Hadler, A. Reingold, A. R. Thomas, L. H. Harrison, N. M. Bennett, M. M. Farley, R. R. Facklam, J. H. Jorgensen, J. Besser, E. R. Zell, A. Schuchat, C. G. Whitney, Effect of Introduction of the Pneumococcal Conjugate Vaccine on Drug-Resistant *Streptococcus pneumoniae*. *N. Engl. J. Med.* **354**, 1455–1463 (2006).
7. D. Thorrington, N. Andrews, J. Stowe, E. Miller, A. J. van Hoek, Elucidating the impact of the pneumococcal conjugate vaccine programme on pneumonia, sepsis and otitis media hospital admissions in England using a composite control. *BMC Med.* **16**, 1–14 (2018).
8. C. Chen, F. Cervero Liceras, S. Flasche, S. Sidharta, J. Yoong, N. Sundaram, M. Jit, Effect and cost-effectiveness of pneumococcal conjugate vaccination: a global modelling analysis. *Lancet Glob. Heal.* **7**, e58–e67 (2019).
9. K. J. Wilby, D. Werry, A review of the effect of immunization programs on antimicrobial utilization. *Vaccine.* **30**, 6509–6514 (2012).
10. W. P. Hanage, J. A. Finkelstein, S. S. Huang, S. I. Pelton, A. E. Stevenson, K. Kleinman, V. L. Hinrichsen, C. Fraser, Evidence that pneumococcal serotype replacement in Massachusetts following conjugate vaccination is now complete. *Epidemics.* **2**, 80–84 (2010).



- 757 11. S. Flasche, A. J. Van Hoek, E. Sheasby, P. Waight, N. Andrews, C. Sheppard, R.  
758 George, E. Miller, Effect of pneumococcal conjugate vaccination on serotype-  
759 specific carriage and invasive disease in England: a cross-sectional study. *PLoS*  
760 *Med.* **8**, e1001017 (2011).
- 761 12. J. A. Lewnard, W. P. Hanage, Making sense of differences in pneumococcal  
762 serotype replacement. *Lancet Infect. Dis.* **3099** (2019), doi:10.1016/s1473-  
763 3099(18)30660-1.
- 764 13. European Centre for Disease Prevention and Control, Antimicrobial consumption  
765 rates by country (2018), (available at  
766 [http://ecdc.europa.eu/en/healthtopics/antimicrobial\\_resistance/esac-net-](http://ecdc.europa.eu/en/healthtopics/antimicrobial_resistance/esac-net-database/Pages/Antimicrobial-consumption-rates-by-country.aspx)  
767 [database/Pages/Antimicrobial-consumption-rates-by-country.aspx](http://ecdc.europa.eu/en/healthtopics/antimicrobial_resistance/esac-net-database/Pages/Antimicrobial-consumption-rates-by-country.aspx)).
- 768 14. World Health Organization, WHO vaccine pipeline tracker (2019), (available at  
769 [https://www.who.int/immunization/research/vaccine\\_pipeline\\_tracker\\_spreads-](https://www.who.int/immunization/research/vaccine_pipeline_tracker_spreadsheets/en/)  
770 [heets/en/](https://www.who.int/immunization/research/vaccine_pipeline_tracker_spreadsheets/en/)).
- 771 15. G. L. Masala, M. Lipsitch, C. Bottomley, S. Flasche, Exploring the role of  
772 competition induced by non-vaccine serotypes for herd protection following  
773 pneumococcal vaccination. *J. R. Soc. Interface.* **14** (2017),  
774 doi:10.1098/rsif.2017.0620.
- 775 16. K. E. Atkins, E. I. Lafferty, S. R. Deeny, N. G. Davies, J. V. Robotham, M. Jit, Use of  
776 mathematical modelling to assess the impact of vaccines on antibiotic resistance.  
777 *Lancet Infect. Dis.* **18**, e204–e213 (2018).
- 778 17. K. E. Atkins, S. Flasche, Vaccination to reduce antimicrobial resistance. *Lancet*  
779 *Glob. Heal.* **6**, e252 (2018).
- 780 18. L. Temime, D. Guillemot, P. Y. Boëlle, Short- and long-term effects of  
781 pneumococcal conjugate vaccination of children on penicillin resistance.  
782 *Antimicrob. Agents Chemother.* **48**, 2206–2213 (2004).
- 783 19. L. Temime, P. Y. Boëlle, A. J. Valleron, D. Guillemot, Penicillin-resistant  
784 pneumococcal meningitis: High antibiotic exposure impedes new vaccine  
785 protection. *Epidemiol. Infect.* **133**, 493–501 (2005).
- 786 20. L. Opatowski, L. Temime, E. Varon, R. Leclerc, H. Drugeon, P.-Y. Boëlle, D.  
787 Guillemot, Antibiotic Innovation May Contribute to Slowing the Dissemination of  
788 Multiresistant Streptococcus pneumoniae: The Example of Ketolides. *PLoS One.* **3**,  
789 e2089 (2008).

- 790 21. T. Van Effelterre, M. R. Moore, F. Fierens, C. G. Whitney, L. White, S. I. Pelton, W. P.  
791 Hausdorff, A dynamic model of pneumococcal infection in the United States:  
792 Implications for prevention through vaccination. *Vaccine*. **28**, 3650–3660 (2010).
- 793 22. M. D. De Cellès, M. Pons-Salort, E. Varon, M. A. Vibet, C. Ligier, V. Letort, L.  
794 Opatowski, D. Guillemot, Interaction of vaccination and reduction of antibiotic use  
795 drives unexpected increase of pneumococcal meningitis. *Sci. Rep.* **5**, 1–11 (2015).
- 796 23. P. K. Mitchell, M. Lipsitch, W. P. Hanage, Carriage burden, multiple colonization  
797 and antibiotic pressure promote emergence of resistant vaccine escape  
798 pneumococci. *Philos. Trans. R. Soc. B Biol. Sci.* **370**, 3–9 (2015).
- 799 24. U. Obolski, J. Lourenço, C. Thompson, R. Thompson, A. Gori, S. Gupta, Vaccination  
800 can drive an increase in frequencies of antibiotic resistance among nonvaccine  
801 serotypes of *Streptococcus pneumoniae*. *Proc. Natl. Acad. Sci.* **115**, 3102–3107  
802 (2018).
- 803 25. C. Colijn, T. Cohen, C. Fraser, W. Hanage, E. Goldstein, N. Givon-Lavi, R. Dagan, M.  
804 Lipsitch, What is the mechanism for persistent coexistence of drug-susceptible  
805 and drug-resistant strains of *Streptococcus pneumoniae*? *J. R. Soc. Interface.* **7**,  
806 905–919 (2010).
- 807 26. N. G. Davies, S. Flasche, M. Jit, K. E. Atkins, Within-host dynamics shape antibiotic  
808 resistance in commensal bacteria. *Nat. Ecol. Evol.* (2019), doi:10.1038/s41559-  
809 018-0786-x.
- 810 27. H. Goossens, M. Ferech, R. Vander Stichele, M. Elseviers, Outpatient antibiotic use  
811 in Europe and association with resistance: A cross-national database study.  
812 *Lancet.* **365**, 579–587 (2005).
- 813 28. European Centre for Disease Prevention and Control, Data from the ECDC  
814 Surveillance Atlas - Antimicrobial resistance (2016), (available at  
815 [https://ecdc.europa.eu/en/antimicrobial-resistance/surveillance-and-disease-](https://ecdc.europa.eu/en/antimicrobial-resistance/surveillance-and-disease-data/data-ecdc)  
816 [data/data-ecdc](https://ecdc.europa.eu/en/antimicrobial-resistance/surveillance-and-disease-data/data-ecdc)).
- 817 29. M. Lipsitch, C. Colijn, T. Cohen, W. P. Hanage, C. Fraser, No coexistence for free:  
818 Neutral null models for multistrain pathogens. *Epidemics.* **1**, 2–13 (2009).
- 819 30. P. Rodrigues, M. G. M. Gomes, C. Rebelo, Drug resistance in tuberculosis-a  
820 reinfection model. *Theor. Popul. Biol.* **71**, 196–212 (2007).
- 821 31. O. Patterson-Lomba, B. M. Althouse, G. M. Goerg, L. Hébert-Dufresne, Optimizing  
822 Treatment Regimes to Hinder Antiviral Resistance in Influenza across Time

- 823 Scales. *PLoS One*. **8**, 1–11 (2013).
- 824 32. I. M. Hastings, Complex dynamics and stability of resistance to antimalarial drugs.  
825 *Parasitology*. **132**, 615–624 (2006).
- 826 33. R. Sergeev, C. Colijn, T. Cohen, Models to understand the population-level impact  
827 of mixed strain M. tuberculosis infections. *J. Theor. Biol.* **280**, 88–100 (2011).
- 828 34. F. Blanquart, S. Lehtinen, M. Lipsitch, C. Fraser, The evolution of antibiotic  
829 resistance in a structured host population. *J. R. Soc. Interface*. **15** (2018),  
830 doi:10.1098/rsif.2018.0040.
- 831 35. M. S. Krieger, A. L. Hill, Long-term coexistence and regional heterogeneity of  
832 antibiotic-resistant infections reproduced by a simple spatial model. *bioRxiv*. **14**,  
833 469171 (2018).
- 834 36. R. Kouyos, E. Klein, B. Grenfell, Hospital-Community Interactions Foster  
835 Coexistence between Methicillin-Resistant Strains of Staphylococcus aureus. *PLoS*  
836 *Pathog.* **9** (2013), doi:10.1371/journal.ppat.1003134.
- 837 37. M. F. Boni, M. W. Feldman, Evolution of Antibiotic Resistance By Human and  
838 Bacterial Niche Construction. *Evolution (N. Y.)*. **59**, 477 (2006).
- 839 38. S. Lehtinen, F. Blanquart, N. J. Croucher, P. Turner, M. Lipsitch, C. Fraser, Evolution  
840 of antibiotic resistance is linked to any genetic mechanism affecting bacterial  
841 duration of carriage. *Proc. Natl. Acad. Sci.* **114**, 1075–1080 (2017).
- 842 39. D. J. Austin, K. G. Kristinsson, R. M. Anderson, The relationship between the  
843 volume of antimicrobial consumption in human communities and the frequency  
844 of resistance. *Proc. Natl. Acad. Sci.* **96**, 1152–1156 (1999).
- 845 40. A. B. Beams, D. J. A. Toth, K. Khader, F. R. Adler, Harnessing intra-host strain  
846 competition to limit antibiotic resistance: mathematical model results. *Bull. Math.*  
847 *Biol.* **78**, 1828–1846 (2016).
- 848 41. K. Græsbøll, S. S. Nielsen, N. Toft, L. E. Christiansen, How fitness reduced,  
849 antimicrobial resistant bacteria survive and spread: A multiple pig - multiple  
850 bacterial strain model. *PLoS One*. **9** (2014), doi:10.1371/journal.pone.0100458.
- 851 42. D. Bogaert, A. Van Belkum, M. Sluijter, A. Luijendijk, R. De Groot, H. C. Rümke, H. A.  
852 Verbrugh, P. W. M. Hermans, Colonisation by *Streptococcus pneumoniae* and  
853 *Staphylococcus aureus* in healthy children. *Lancet*. **363**, 1871–1872 (2004).
- 854 43. D. M. Weinberger, V. E. Pitzer, G. Regev-Yochay, N. Givon-Lavi, R. Dagan,  
855 Association between the Decline in Pneumococcal Disease in Unimmunized

- 856 Adults and Vaccine-Derived Protection Against Colonization in Toddlers and  
857 Preschool-Aged Children. *Am. J. Epidemiol.* **188**, 160–168 (2019).
- 858 44. D. I. Andersson, The biological cost of mutational antibiotic resistance: any  
859 practical conclusions? *Curr. Opin. Microbiol.* **9** (2006), pp. 461–465.
- 860 45. D. I. Andersson, D. Hughes, Antibiotic resistance and its cost: Is it possible to  
861 reverse resistance? *Nat. Rev. Microbiol.* **8**, 260–271 (2010).
- 862 46. C. Tedijanto, S. Olesen, Y. Grad, M. Lipsitch, Estimating the proportion of  
863 bystander selection for antibiotic resistance among potentially pathogenic  
864 bacterial flora. *Proc Natl Acad Sci USA.* **115**, E11988–E11995 (2018).
- 865 47. L. Högberg, P. Geli, H. Ringberg, E. Melander, M. Lipsitch, K. Ekdahl, Age- and  
866 serogroup-related differences in observed durations of nasopharyngeal carriage  
867 of penicillin-resistant pneumococci. *J. Clin. Microbiol.* **45**, 948–952 (2007).
- 868 48. A. Melegaro, N. J. Gay, G. F. Medley, Estimating the transmission parameters of  
869 pneumococcal carriage in households. *Epidemiol. Infect.* **132**, 433–441 (2004).
- 870 49. S. Cobey, M. Lipsitch, Niche and neutral effects of acquired immunity permit  
871 coexistence of pneumococcal serotypes. *Science (80-. ).* **335**, 1376–1380 (2012).
- 872 50. R. Malley, P. W. Anderson, Serotype-independent pneumococcal experimental  
873 vaccines that induce cellular as well as humoral immunity. *Proc. Natl. Acad. Sci. U.*  
874 *S. A.* **109**, 3623–3627 (2012).
- 875 51. S. P. Jochems, J. N. Weiser, R. Malley, D. M. Ferreira, The immunological  
876 mechanisms that control pneumococcal carriage. *PLoS Pathog.* **13**, 1–14 (2017).
- 877 52. UK Department of Health and Social Care, “Tackling antimicrobial resistance 2019  
878 to 2024: the UK’s 5-year national action plan” (2019), (available at  
879 [https://www.gov.uk/government/publications/uk-5-year-action-plan-for-](https://www.gov.uk/government/publications/uk-5-year-action-plan-for-antimicrobial-resistance-2019-to-2024)  
880 [antimicrobial-resistance-2019-to-2024](https://www.gov.uk/government/publications/uk-5-year-action-plan-for-antimicrobial-resistance-2019-to-2024)).
- 881 53. B. S. Buckley, N. Henschke, H. Bergman, B. Skidmore, E. J. Klemm, G. Villanueva, C.  
882 Garritty, M. Paul, Impact of vaccination on antibiotic usage: a systematic review  
883 and meta-analysis. *Clin. Microbiol. Infect.* **In press** (2019),  
884 doi:10.1016/j.cmi.2019.06.030.
- 885 54. A. Von Gottberg, L. De Gouveia, S. Tempia, V. Quan, S. Meiring, C. Von Mollendorf,  
886 S. A. Madhi, E. R. Zell, M. Stat, J. R. Verani, K. L. O’Brien, C. G. Whitney, K. P.  
887 Klugman, C. Cohen, Effects of vaccination on invasive pneumococcal disease in  
888 South Africa. *N. Engl. J. Med.* **371**, 1889–1899 (2014).

- 889 55. A. Cassini, L. D. Högberg, D. Plachouras, A. Quattrocchi, A. Hoxha, G. S. Simonsen,  
890 M. Colomb-Cotinat, M. E. Kretzschmar, B. Devleeschauwer, M. Cecchini, D. A.  
891 Ouakrim, T. C. Oliveira, M. J. Struelens, C. Suetens, D. L. Monnet, R. Strauss, K.  
892 Mertens, T. Struyf, B. Catry, K. Latour, I. N. Ivanov, E. G. Dobрева, A. Tambic  
893 Andrašević, S. Soprek, A. Budimir, N. Paphitou, H. Žemlicková, S. Schytte Olsen, U.  
894 Wolff Sönksen, P. Märtin, M. Ivanova, O. Lyytikäinen, J. Jalava, B. Coignard, T.  
895 Eckmanns, M. Abu Sin, S. Haller, G. L. Daikos, A. Gikas, S. Tsiodras, F. Kontopidou,  
896 Á. Tóth, Á. Hajdu, Ó. Guólaugsson, K. G. Kristinsson, S. Murchan, K. Burns, P.  
897 Pezzotti, C. Gagliotti, U. Dumpis, A. Liuimiene, M. Perrin, M. A. Borg, S. C. de Greeff,  
898 J. C. Monen, M. B. Koek, P. Elstrøm, D. Zabicka, A. Deptula, W. Hryniewicz, M.  
899 Caniça, P. J. Nogueira, P. A. Fernandes, V. Manageiro, G. A. Popescu, R. I. Serban, E.  
900 Schréterová, S. Litvová, M. Štefkovicová, J. Kolman, I. Klavs, A. Korošec, B. Aracil, A.  
901 Asensio, M. Pérez-Vázquez, H. Billström, S. Larsson, J. S. Reilly, A. Johnson, S.  
902 Hopkins, Attributable deaths and disability-adjusted life-years caused by  
903 infections with antibiotic-resistant bacteria in the EU and the European Economic  
904 Area in 2015: a population-level modelling analysis. *Lancet Infect. Dis.* **19**, 56–66  
905 (2019).
- 906 56. M. Kobayashi, L. M. Conklin, G. Bigogo, G. Jagero, L. Hampton, K. E. Fleming-Dutra,  
907 M. Jung-hae, M. da G. Carvalho, F. Pimenta, B. Beall, T. Taylor, K. F. Laserson, J.  
908 Vulule, C. Van Beneden, L. Kim, D. R. Feikin, C. G. Whitney, R. F. Breiman,  
909 Pneumococcal carriage and antibiotic susceptibility patterns from two cross-  
910 sectional colonization surveys among children aged <math>\leq 5</math> years prior to the  
911 introduction of 10-valent pneumococcal conjugate vaccine - Kenya, 2009-2010.  
912 *BMC Infect. Dis.* **17**, 1–12 (2017).
- 913 57. M. Lipsitch, O. Abdullahi, A. D'Amour, W. Xie, D. M. Weinberger, E. Tchetgen  
914 Tchetgen, J. A. G. Scott, Estimating rates of carriage acquisition and clearance and  
915 competitive ability for pneumococcal serotypes in Kenya with a Markov  
916 transition model. *Epidemiology.* **23**, 510–519 (2012).
- 917 58. I. Rudan, K. L. O'Brien, H. Nair, L. Liu, E. Theodoratou, S. Qazi, I. Luksic, C. L. F.  
918 Walker, R. E. Black, H. Campbell, Child Health Epidemiology Reference Group,  
919 Epidemiology and etiology of childhood pneumonia in 2010: estimates of  
920 incidence, severe morbidity, mortality, underlying risk factors and causative  
921 pathogens for 192 countries. *J. Glob. Health.* **3**, S114-010401 (2013).

- 922 59. A. N. Torné, J. G. Dias, C. Quinten, F. Hruba, M. C. Busana, P. L. Lopalco, A. J. A.  
923 Gauci, L. Pastore-Celentano, M. Sabbe, J. Verhaegen, M. Koliou, D. Pieridou-  
924 Bagkatzouni, P. Křižová, J. Kozakova, J. Motlova, P. Valentiner-Branth, L.  
925 Lambertsen, T. Georgakopoulou, H. Humphreys, T. Melillo, P. Caruana, M. Knol, H.  
926 de Merkel, K. Elberse, D. Frimann, A. Skoczynska, W. Hryniewicz, A. Kuch, I.  
927 Paradowska-Stankiewicz, M. Pana, M. Vitek, V. Učakar, B. H. Normark, T. Lepp, M.  
928 Slack, P. A. Waight, European enhanced surveillance of invasive pneumococcal  
929 disease in 2010: Data from 26 European countries in the post-heptavalent  
930 conjugate vaccine era. *Vaccine*. **32**, 3644–3650 (2014).
- 931 60. M. Tin Tin Htar, D. Christopoulou, H. J. Schmitt, Pneumococcal serotype evolution  
932 in Western Europe. *BMC Infect. Dis.* **15**, 1–10 (2015).
- 933 61. B. Simell, K. Auranen, H. Käyhty, D. Goldblatt, R. Dagan, K. L. O'Brien, The  
934 fundamental link between pneumococcal carriage and disease. *Expert Rev.*  
935 *Vaccines*. **11**, 841–855 (2012).
- 936 62. S. Flasche, A. Guilder, Using a mathematical model to assess the potential effects  
937 of a new vaccine approach that targets enhanced clearance of pneumococcal  
938 carriage. (2018).
- 939 63. M. C. Negri, M. Lipsitch, J. Blázquez, B. R. Levin, F. Baquero, Concentration-  
940 dependent selection of small phenotypic differences in TEM beta-lactamase-  
941 mediated antibiotic resistance. *Antimicrob. Agents Chemother.* **44**, 2485–91  
942 (2000).
- 943 64. A. R. Wargo, S. Huijben, J. C. de Roode, J. Shepherd, A. F. Read, Competitive release  
944 and facilitation of drug-resistant parasites after therapeutic chemotherapy in a  
945 rodent malaria model. *Proc. Natl. Acad. Sci.* **104**, 19914–19919 (2007).
- 946 65. N. Wale, D. G. Sim, M. J. Jones, R. Salathe, T. Day, A. F. Read, Resource limitation  
947 prevents the emergence of drug resistance by intensifying within-host  
948 competition. *Proc. Natl. Acad. Sci.*, 201715874 (2017).
- 949 66. J. A. Lewnard, P. A. Tähtinen, M. K. Laine, L. Lindholm, J. Jalava, P. Huovinen, M.  
950 Lipsitch, A. Ruohola, Impact of antimicrobial treatment for acute otitis media on  
951 carriage dynamics of penicillin-susceptible and penicillin–non-susceptible  
952 *Streptococcus pneumoniae*. *J. Infect. Dis.*, jiy343 (2018).
- 953 67. M. Filippini, G. Masiero, K. Moschetti, Socioeconomic determinants of regional  
954 differences in outpatient antibiotic consumption: Evidence from Switzerland.

- 955 *Health Policy (New York)*. **78**, 77–92 (2006).
- 956 68. D. Koller, F. Hoffmann, W. Maier, K. Tholen, R. Windt, G. Glaeske, Variation in  
957 antibiotic prescriptions: Is area deprivation an explanation? Analysis of 1.2  
958 million children in Germany. *Infection*. **41**, 121–127 (2013).
- 959 69. M. Di Martino, A. Lallo, U. Kirchmayer, M. Davoli, D. Fusco, Prevalence of antibiotic  
960 prescription in pediatric outpatients in Italy: The role of local health districts and  
961 primary care physicians in determining variation. A multilevel design for  
962 healthcare decision support. *BMC Public Health*. **17**, 1–8 (2017).
- 963 70. M. C. Goossens, B. Catry, J. Verhaegen, Antimicrobial resistance to benzylpenicillin  
964 in invasive pneumococcal disease in Belgium, 2003-2010: The effect of altering  
965 clinical breakpoints. *Epidemiol. Infect.* **141**, 490–495 (2013).
- 966 71. S. Cobey, E. B. Baskerville, C. Colijn, W. Hanage, C. Fraser, M. Lipsitch, Host  
967 population structure and treatment frequency maintain balancing selection on  
968 drug resistance. *J. R. Soc. Interface*. **14**, 20170295 (2017).
- 969 72. C. Ter Braak, A Markov Chain Monte Carlo version of the genetic algorithm  
970 Differential Evolution: Easy Bayesian computing for real parameter spaces. *Stat.*  
971 *Comput.* **16**, 239–249 (2006).
- 972 73. T. Smieszek, K. B. Pouwels, F. C. K. Dolk, D. R. M. Smith, S. Hopkins, M. Sharland, A.  
973 D. Hay, M. V Moore, J. V Robotham, Potential for reducing inappropriate antibiotic  
974 prescribing in English primary care. *J. Antimicrob. Chemother.* **73**, ii36–ii43  
975 (2018).
- 976

977

## Acknowledgements

978

979 N.G.D., M.J. and K.E.A. were funded by the National Institute for Health Research Health  
980 Protection Research Unit in Immunisation at the London School of Hygiene and Tropical  
981 Medicine in partnership with Public Health England. The views expressed are those of  
982 the authors and not necessarily those of the NHS, National Institute for Health Research,  
983 Department of Health or Public Health England. S.F. was supported by a Sir Henry Dale  
984 Fellowship jointly funded by the Wellcome Trust and Royal Society (grant number  
985 208812/Z/17/Z).



986 **Table 1. Mechanisms for maintaining coexistence**

|             | Mechanism                                             | Mode of action                                                                                    | Plausible mechanism for coexistence in <i>S. pneumoniae</i> ?                                      | Consistent with empirical patterns? |
|-------------|-------------------------------------------------------|---------------------------------------------------------------------------------------------------|----------------------------------------------------------------------------------------------------|-------------------------------------|
| DIVERSITY   | <b>Treatment diversity</b>                            | Assortatively-mixing subpopulations differ in treatment rates (25, 34–37)                         | ✓ Yes                                                                                              | ✓ Yes                               |
|             | <b>Pathogen diversity</b>                             | Subtypes maintained by diversifying selection differ in propensity for resistance (38)            | ✓ Yes                                                                                              | ✓ Yes                               |
|             | <b>Treated class</b>                                  | Individuals currently in treatment maintain resistant strains (25, 34, 39, 40)                    | ✗ No: Only supports a small amount of coexistence (25)                                             | ■ N/A                               |
|             | <b>Within-host niches</b>                             | Sensitive and resistant strains exploit separate niches within the host (30, 41)                  | ✗ No: Resistant and sensitive strains are known to occupy the same niches (29)                     | ■ N/A                               |
|             | <b>Mutation pressure</b>                              | Mutation-selection balance maintains intermediate resistance frequency (30, 31, 37)               | ✗ No: De novo acquisition of resistance in <i>S. pneumoniae</i> is not frequent enough (25)        | ■ N/A                               |
|             | <b>Prescription feedback</b>                          | Doctors reduce prescribing of a drug as resistance to it increases (37, 39)                       | ✗ No: Does not explain how coexistence is maintained over a range of treatment rates               | ■ N/A                               |
| COMPETITION | <b>Within-host competition: Treatment competition</b> | Within-host competition creates frequency-dependent selection for resistance (25, 26, 32, 33, 40) | ✓ Yes                                                                                              | ✓ Yes                               |
|             | <b>Within-host competition: Growth competition</b>    | “                                                                                                 | ✓ Yes                                                                                              | ✓ Yes                               |
|             | <b>Superinfection</b>                                 | Superinfection creates frequency-dependent selection for resistance (30)                          | ✗ No: Requires resistant strain to transmit better than sensitive strain in absence of antibiotics | ■ N/A                               |

987

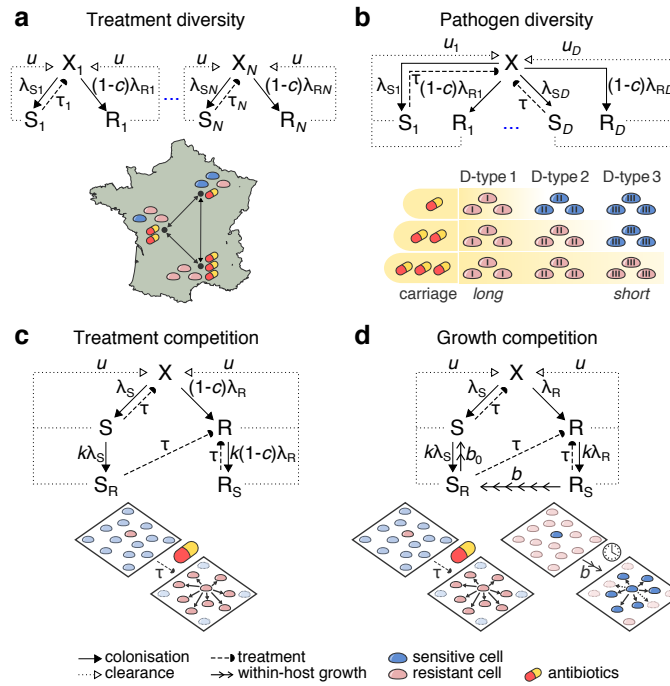

988

989

990 **Fig. 1. Four models of resistance evolution.** X hosts are uncolonised, S hosts are  
 991 colonised with the sensitive strain and R hosts are colonised with the resistant strain.  $\lambda_S$   
 992 and  $\lambda_R$  are the force of infection of the sensitive and resistant strain, respectively;  $c$  is  
 993 the transmission cost of resistance;  $u$  is the natural clearance rate; and  $\tau$  is the rate of  
 994 antibiotic treatment. **(a)** “Treatment diversity”: each country is split into  
 995 subpopulations varying in treatment rate  $\tau_i$ . Assortative mixing between  
 996 subpopulations maintains coexistence. **(b)** “Pathogen diversity”: the pathogen comes in  
 997 multiple subtypes maintained by diversifying selection, each with its own clearance rate  
 998  $u_d$ . Subtypes with a longer carriage duration experience stronger selection for  
 999 resistance than those with a shorter carriage duration, which maintains circulation of  
 1000 both sensitive and resistant strains overall. **(c)** “Treatment competition”: singly-  
 1001 colonised hosts can acquire a small amount of another strain at relative rate  $k$  (host  
 1002 states  $S_R$  and  $R_S$ ). Population-level coexistence is maintained by treatment-mediated  
 1003 within-host competition between co-colonising strains. **(d)** “Growth competition”: as in  
 1004 (c), but the transmission cost of resistance is removed and sensitive strains now  
 1005 outgrow resistant strains within co-colonised hosts at rate  $b$ . Coexistence is maintained  
 1006 by both treatment-mediated and growth-mediated within-host competition.

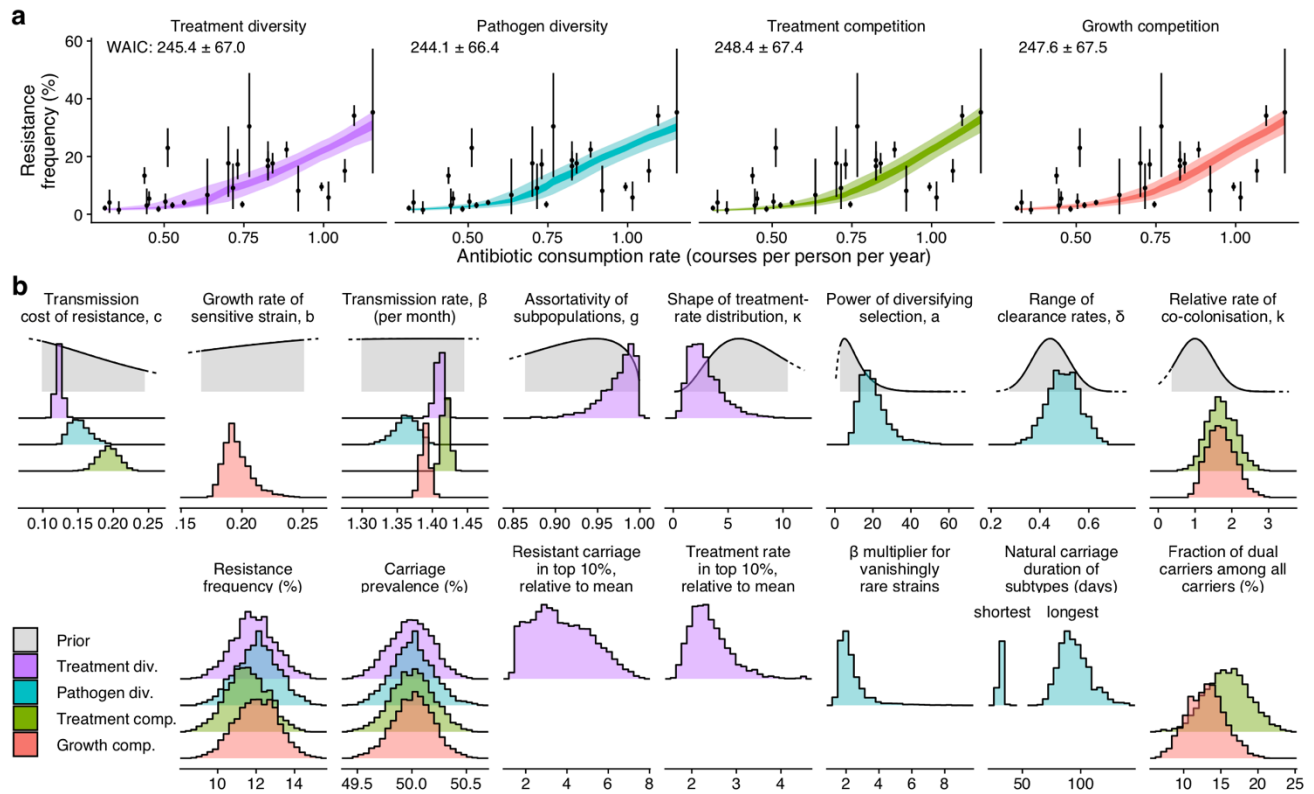

1007

1008

1009

1010

1011

1012

1013

1014

1015

1016

**Fig 2. Four models reproduce patterns of resistance in *S. pneumoniae* in Europe.**

**(a)** Model fits with associated WAIC ( $\pm$  standard error). Vertical lines show the 95% highest density intervals (HDIs) for the reported proportion of invasive *S. pneumoniae* isolates that are resistant to penicillin plotted against the penicillin consumption rate in under-5s. Ribbons show the 50% and 95% HDIs for resistance prevalence from each fitted model. **(b)** The top row shows estimated posterior distributions for the free parameters in each model; the bottom row shows model outputs associated with these parameters to aid interpretation.

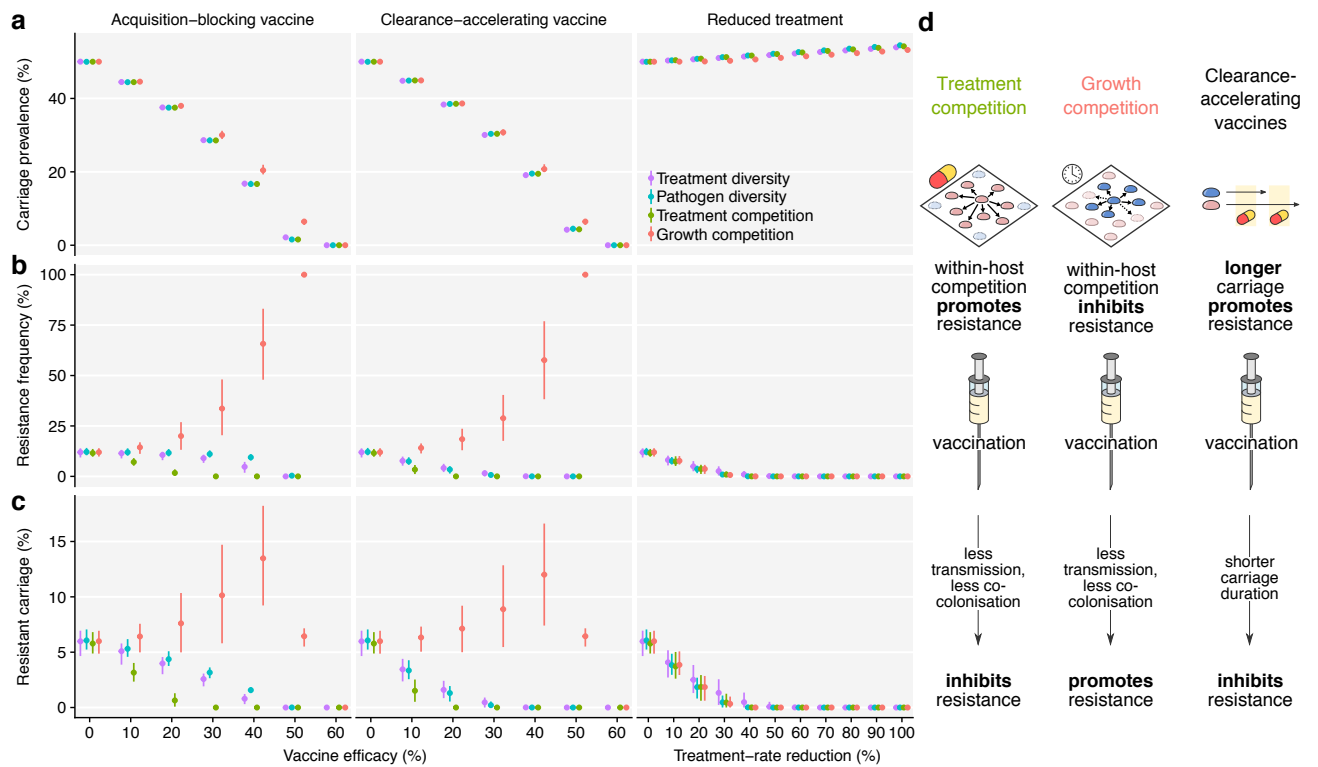

1017

1018

1019

1020

1021

1022

**Fig. 3. Impact of interventions.** Impact of vaccine and treatment interventions on **(a)** carriage prevalence, **(b)** resistance frequency, and **(c)** resistant carriage (mean and 95% HDI). **(d)** Illustration of the strongest forces selecting for greater or lesser resistance across models.

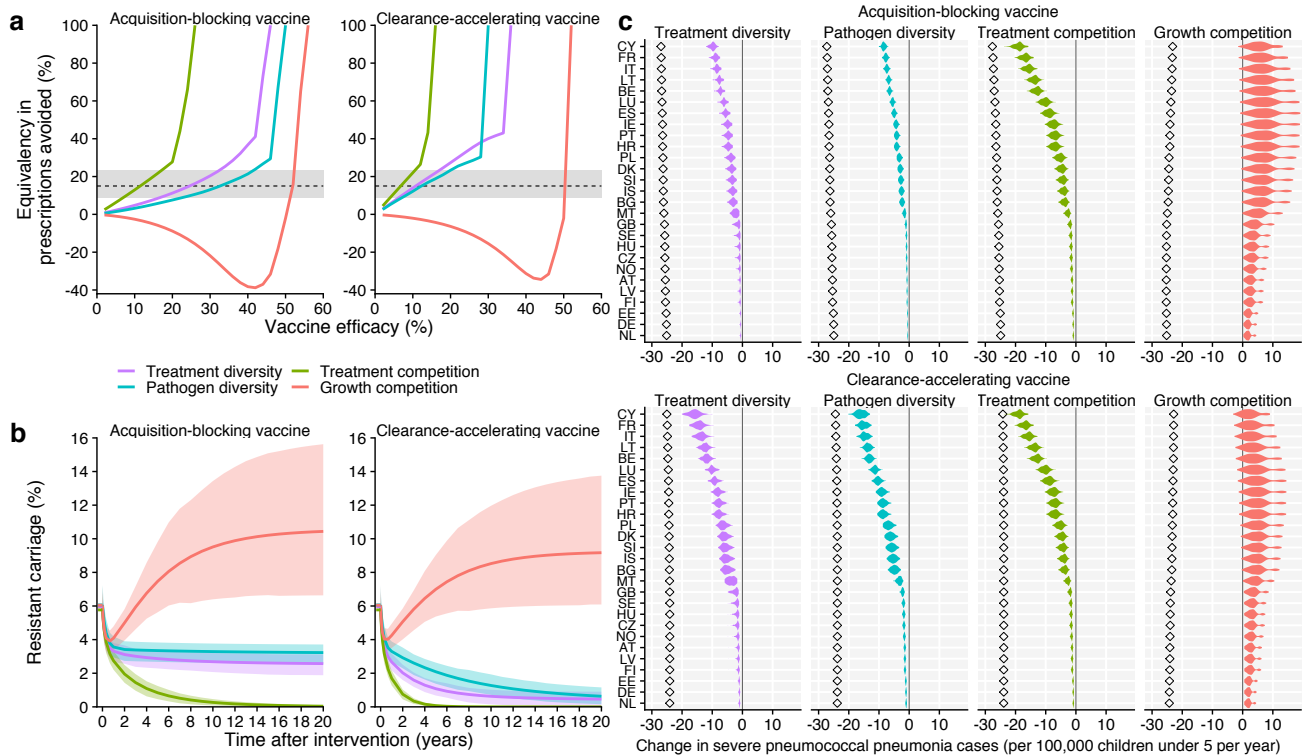

1023

1024

1025 **Fig. 4. Policy considerations. (a)** Median equivalent reduction in prescribing across  
 1026 four models of resistance evolution, in terms of vaccine efficacy at reducing the  
 1027 prevalence of resistant pneumococcal carriage. This demonstrates the vaccine efficacy  
 1028 required to achieve a similar decrease in resistant carriage to a given reduction in  
 1029 antibiotic prescription rates. The impact on overall pneumococcal carriage is not  
 1030 considered here. The shaded bar shows an 8.8–23.1% reduction in prescriptions, an  
 1031 estimate of the percentage of prescriptions which are clinically inappropriate in the UK  
 1032 (73). The dashed line shows a 15% reduction in prescriptions, which has recently been  
 1033 announced as a target by the UK government (52). **(b)** The full impact of vaccination,  
 1034 illustrated here with 30% vaccine efficacy, can take 5–20 years to play out (mean and  
 1035 95% HDI). **(c)** Per-country impact of vaccination at 30% efficacy. Countries reporting to  
 1036 ECDC are ordered from lowest (NL) to highest (CY) reported rate of penicillin  
 1037 consumption. Diamonds show the estimated change in all pneumococcal pneumonia  
 1038 cases, while filled distributions show the change in resistant cases.

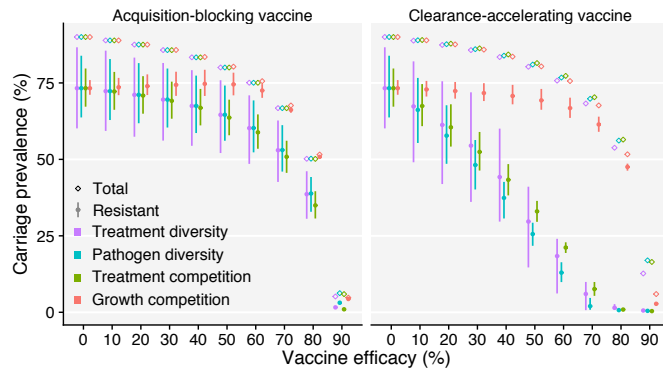

1039

1040

1041

1042

1043

1044

**Fig. 5. Vaccine impact in a high-burden setting.** Adjusting fitted models to be consistent with a high-burden setting yields different predictions for vaccine impact, highlighting both increased challenges and greater opportunities for resistance management via vaccination.

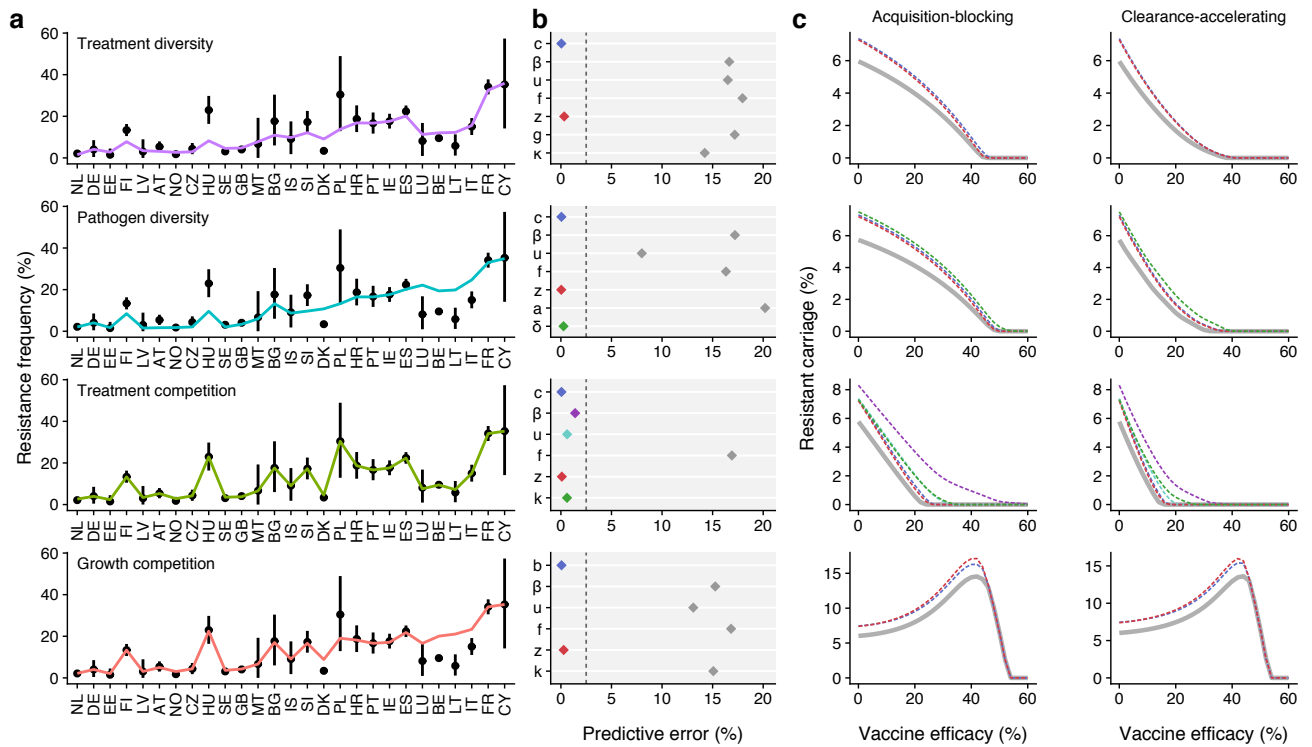

1045  
1046

1047

1048

1049

1050

1051

1052

1053

1054

1055

1056

**Fig 6. Explaining additional between-country variation in resistance frequency.**

Allowing model parameters to vary across countries captures additional between-country variation in resistance frequency not captured by variation in the treatment rate. For example, (a) allowing the transmission rate  $\beta$  to vary across countries can explain the variation in some but not all models. (b) Depending upon which parameter is allowed to vary, models differ in how well they explain all additional between-country variation, with a clear separation (dashed line) between flexible and inflexible models. (c) Model-specific predictions for the impact of vaccination among those parameters that do fully capture the observed variation remain similar. Solid grey lines show “base” model; dashed lines correspond with colours in panel b.

1057

Supplementary Materials for

1058

1059

**Competition and diversity determine vaccine impact**

1060

**on antibiotic resistance evolution**

1061

1062

Nicholas G. Davies, Stefan Flasche, Mark Jit, Katherine E. Atkins



1063 **Supplementary Tables 1–7**

1064

1065 These tables can be found in an Excel spreadsheet accompanying the article.

1066

1067 *Literature review* — Details of the literature review used to identify mechanisms for  
1068 maintaining coexistence between sensitive and resistant bacterial strains.

1069

1070 *Summary of model parameters* — Table describing model parameters and assumed  
1071 values or prior distributions for model fitting.

1072

1073 *Carriage duration* — Calculation of mean pneumococcal carriage duration for children  
1074 under 5 years old in European settings.

1075

1076 *Penicillin consumption* — Calculation of the mean number of defined daily doses of  
1077 penicillin corresponding to a single treatment course for children under 5 years old in  
1078 European countries.

1079

1080 *Pneumococcal morbidity* — Calculation of the annual number of pneumococcal  
1081 pneumonia cases in children under 5 in Europe and Kenya.

1082

1083 *Carriage duration (Kilifi)* — Calculation of mean pneumococcal carriage duration for  
1084 children under 5 years old in Kilifi, Kenya.

1085

1086 *MCMC diagnostics* — Widely Applicable Information Criteria (WAIC), Leave-One-Out  
1087 Information Criteria (LOOIC), effective posterior sample size and Gelman-Rubin  
1088 diagnostics for Bayesian inference model fitting using Markov chain Monte Carlo.

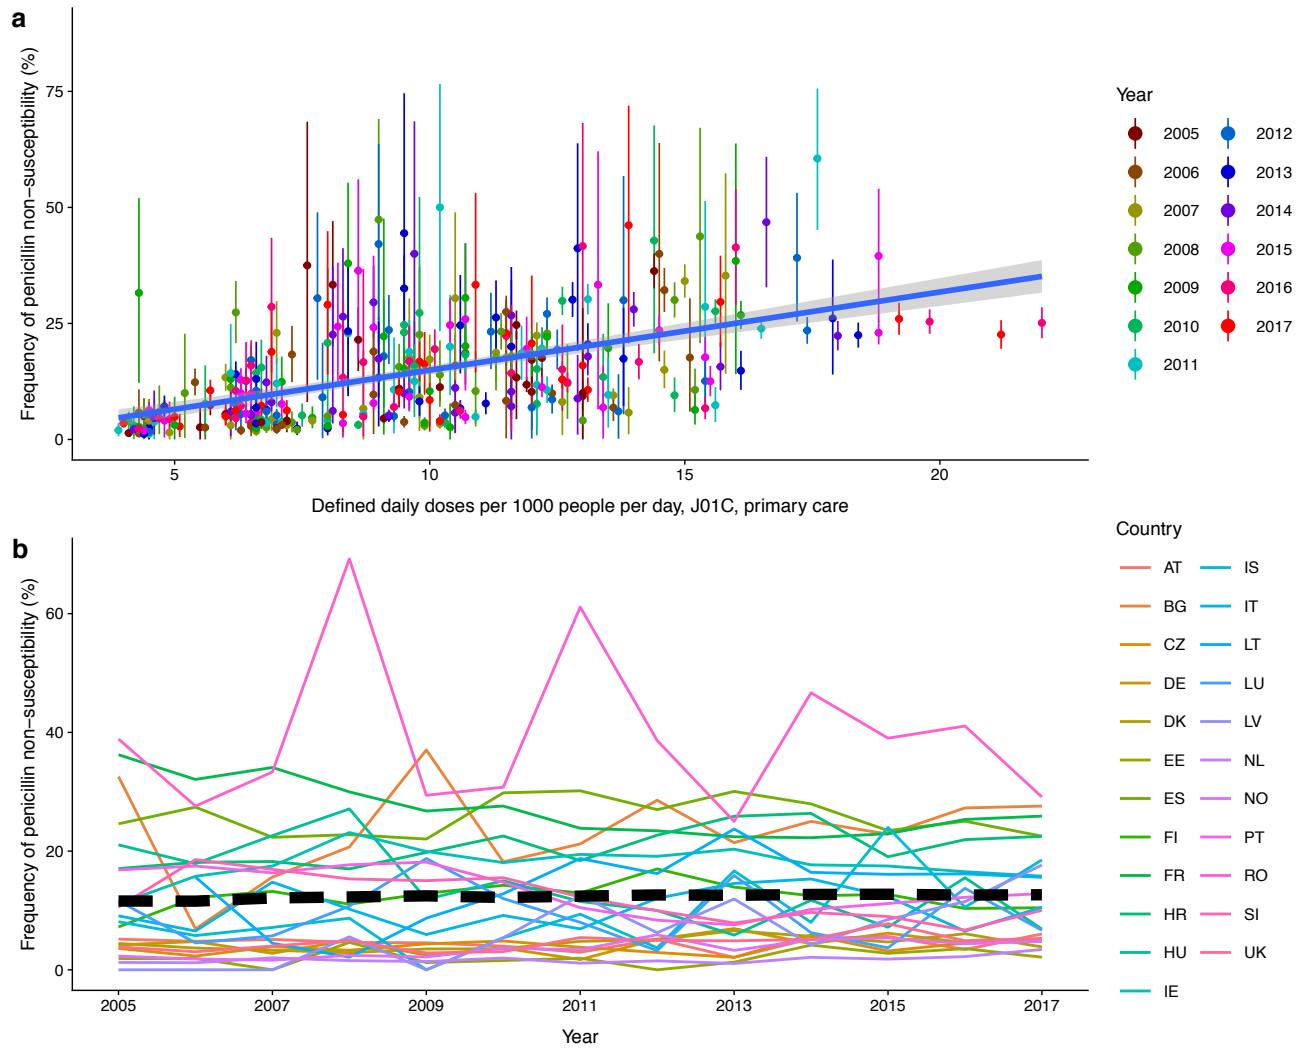

1089

1090 **Supplementary Fig. 1.** Patterns of penicillin non-susceptibility across European  
1091 countries, 2005–2017. **(a)** The frequency of penicillin non-susceptibility in  
1092 pneumococcal isolates (mean and 95% HDI) increases roughly linearly with the  
1093 primary care consumption of penicillins (ATC class J01C). Data from Belgium after 2007  
1094 are excluded because of changes to the definition of non-susceptibility after this year.  
1095 **(b)** The frequency of penicillin non-susceptibility has fluctuated in individual countries  
1096 between 2005 and 2017, but the European population-weighted average (thick dashed  
1097 line) has remained stable at roughly 12%.

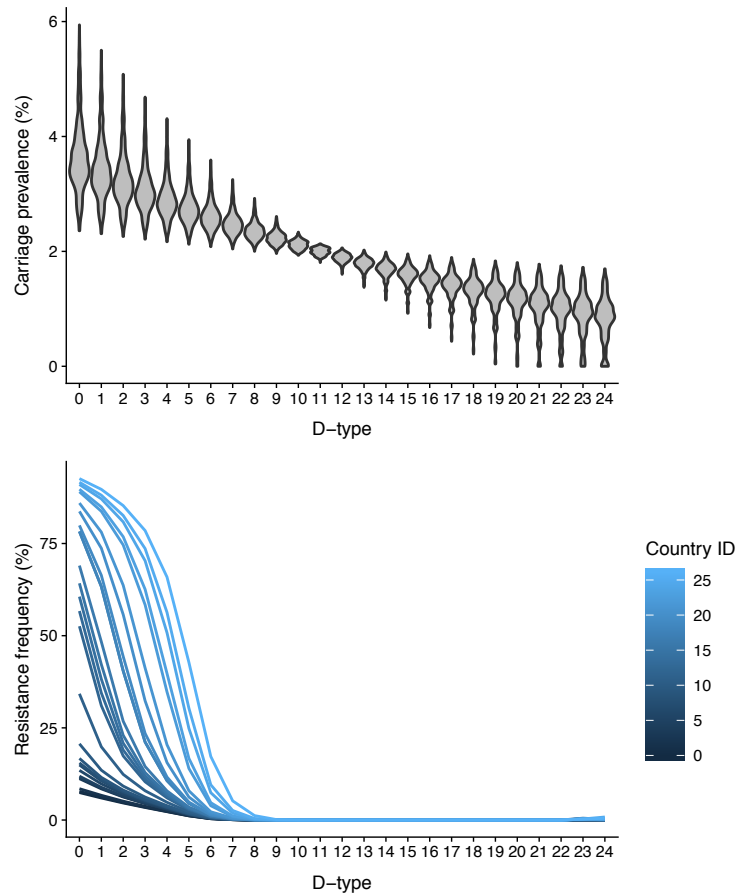

1098

1099 **Supplementary Fig. 2.** Distribution of carriage prevalence and resistance frequency in  
1100 the “Pathogen diversity” model. This verifies that the D-types with the highest  
1101 prevalence of carriage (averaged over all countries, above) also exhibit the highest  
1102 resistance frequency (separated by country, below), and shows that at equilibrium, D-  
1103 types can exhibit intermediate frequencies of resistance.

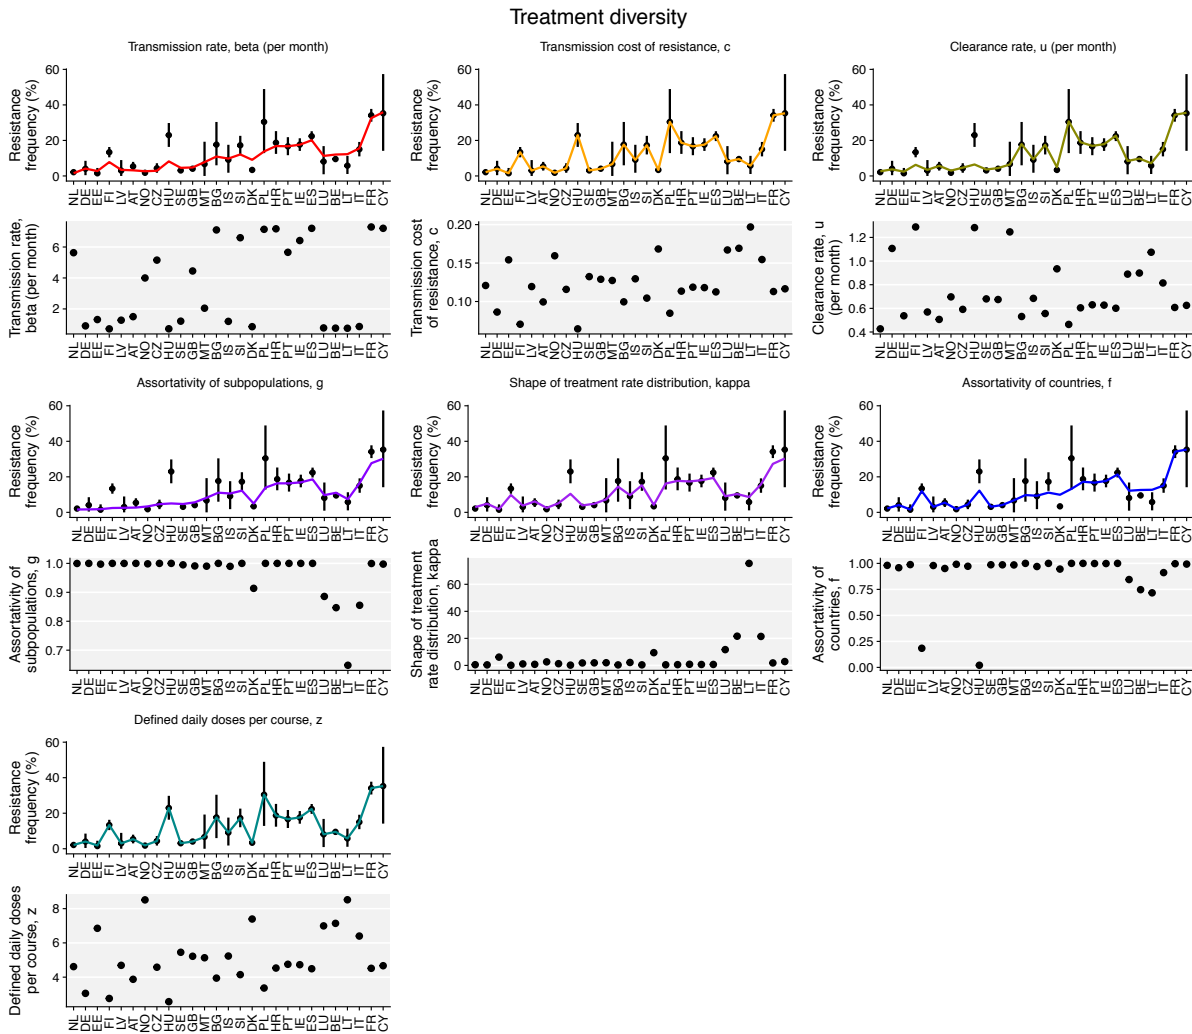

1104

1105

1106 **Supplementary Fig. 3.** Maximum *a posteriori* fits for the “Treatment diversity” model

1107 allowing one parameter to vary between countries. Parameters *c* and *z* can capture the

1108 additional variation in resistance frequency between countries.

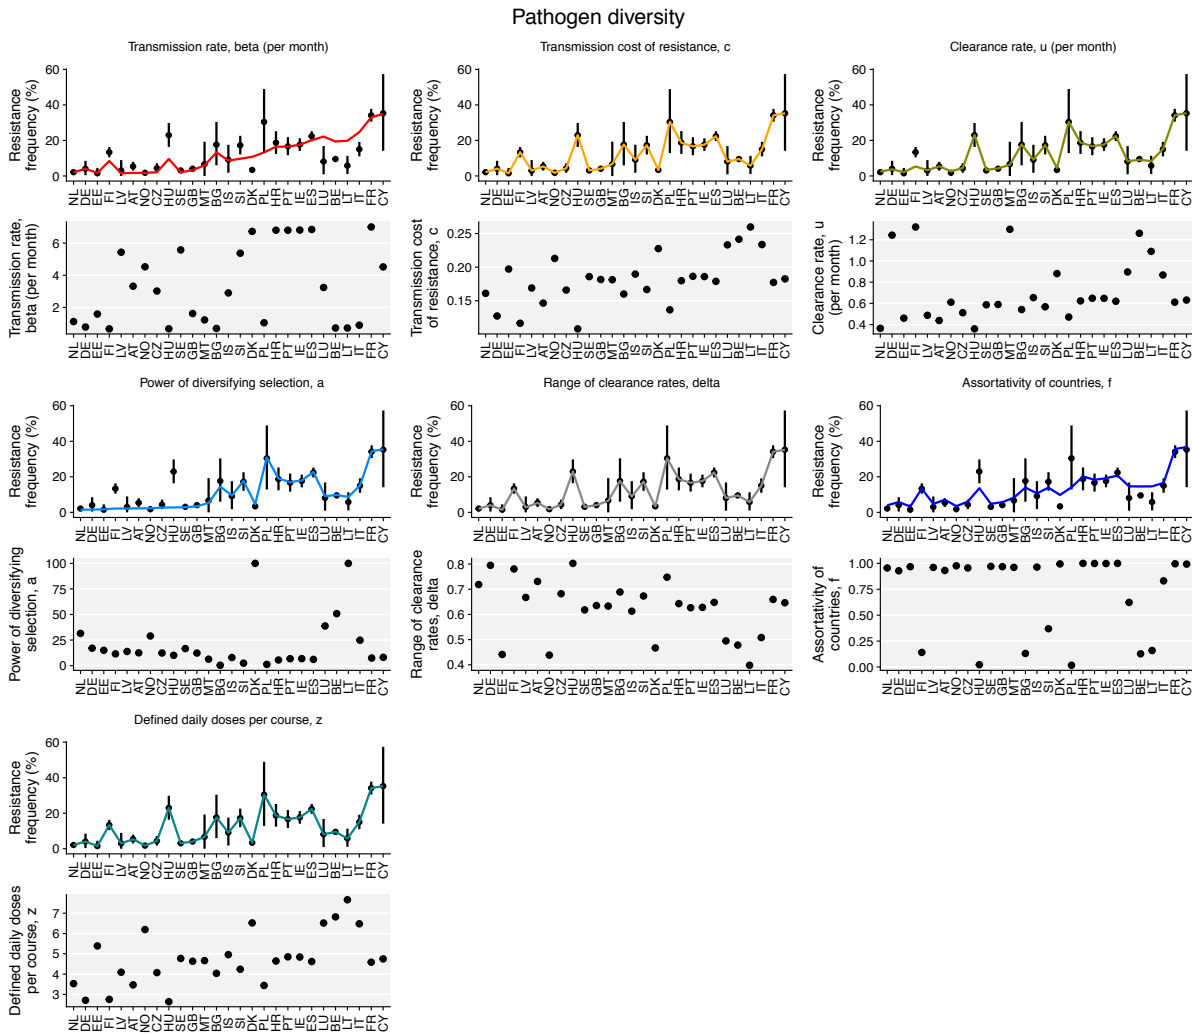

1109

1110

1111 **Supplementary Fig. 4.** Maximum *a posteriori* fits for the "Pathogen diversity" model

1112 allowing one parameter to vary between countries. Parameters  $c$ ,  $\delta$ , and  $z$  can capture

1113 the additional variation in resistance frequency between countries.

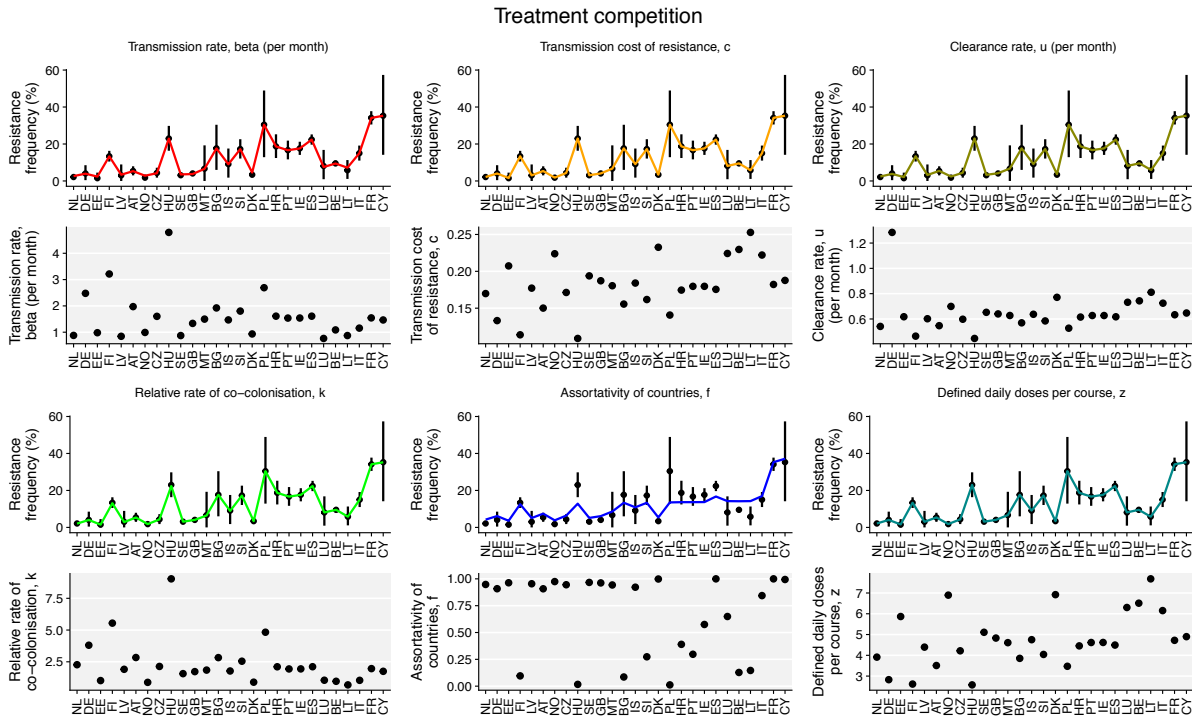

1114

1115

1116 **Supplementary Fig. 5.** Maximum *a posteriori* fits for the “Treatment competition”

1117 model allowing one parameter to vary between countries. Parameters  $\beta$ ,  $c$ ,  $u$ ,  $k$ , and  $z$

1118 can capture the additional variation in resistance frequency between countries.

### Growth competition

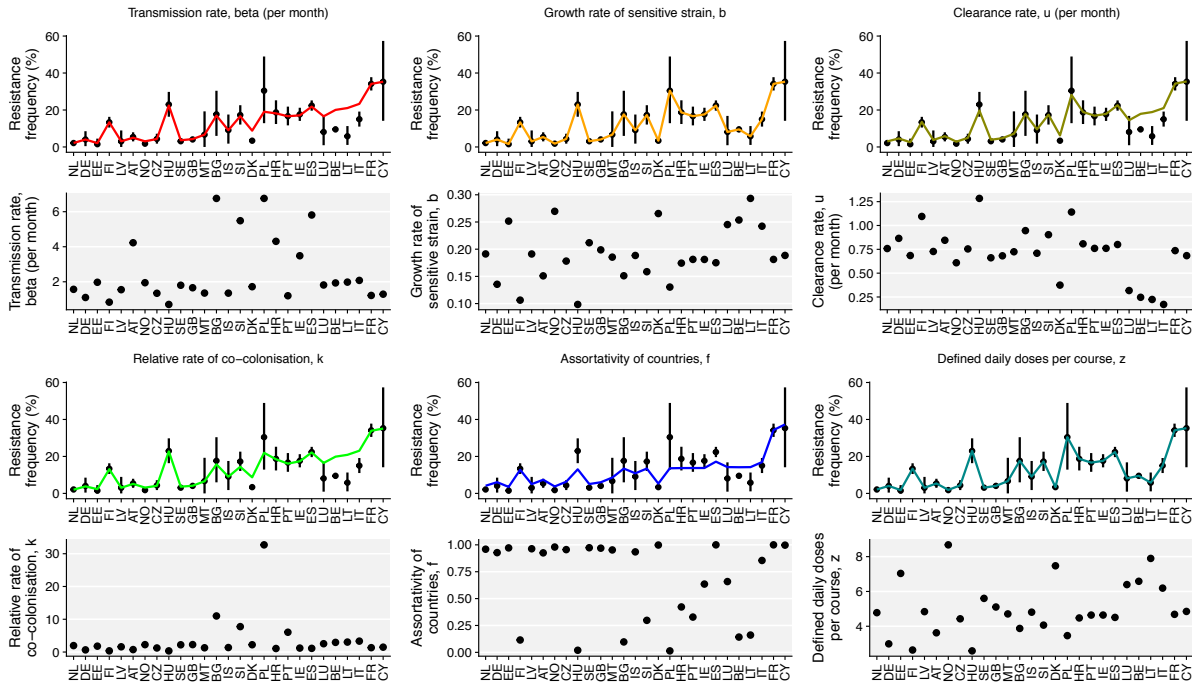

1119

1120

1121 **Supplementary Fig. 6.** Maximum *a posteriori* fits for the “Growth competition” model

1122 allowing one parameter to vary between countries. Parameters *b* and *z* can capture the

1123 additional variation in resistance frequency between countries.

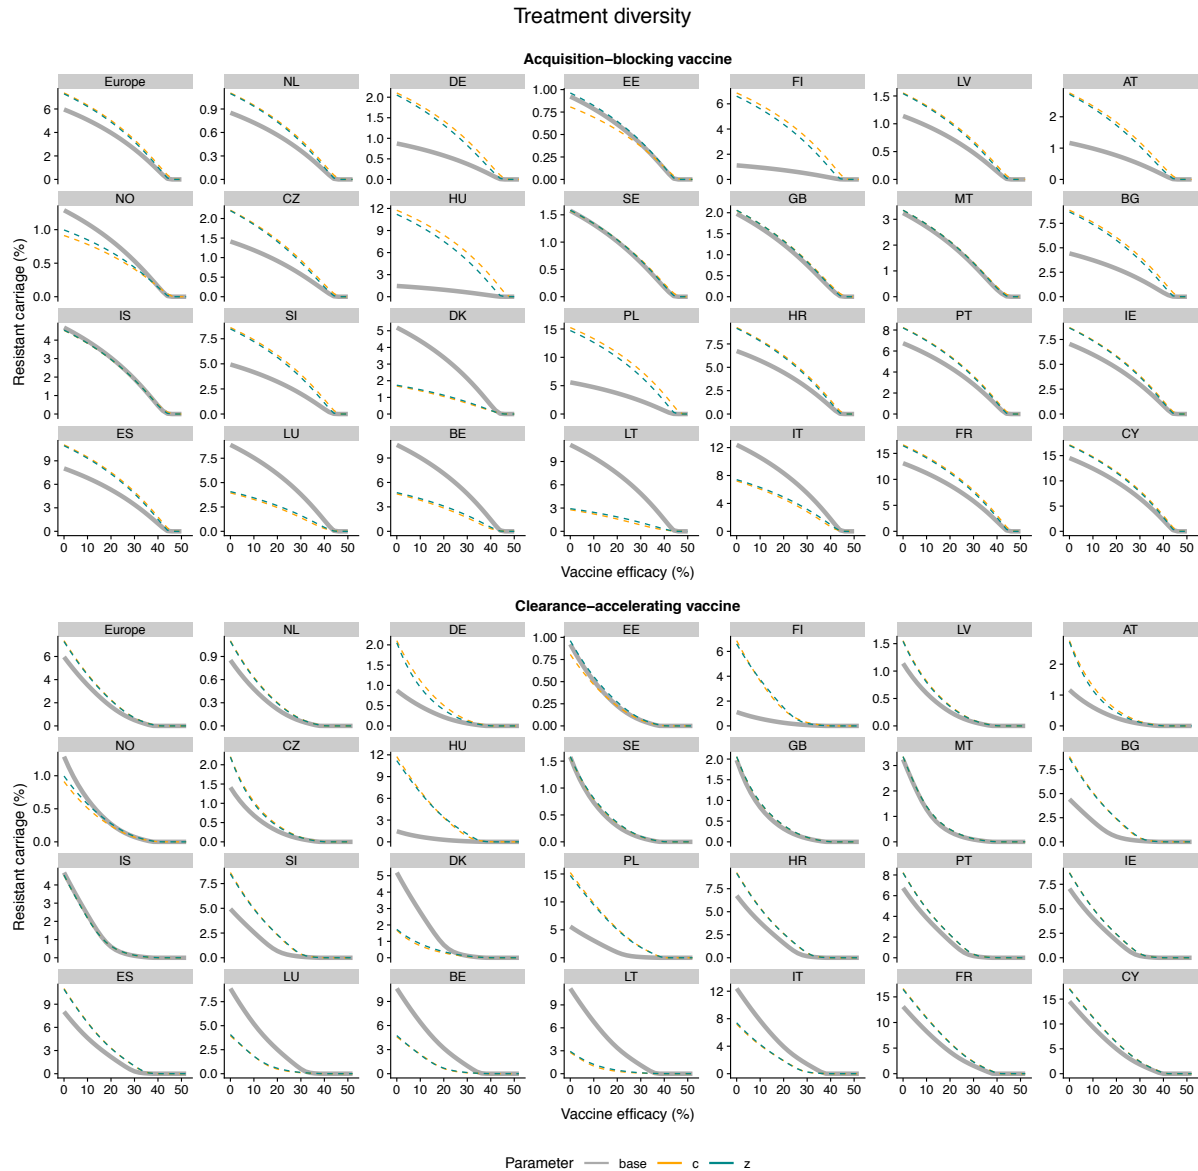

1124

1125

1126 **Supplementary Fig. 7.** Impact of vaccination under the “Treatment diversity” model,

1127 for those parameters able to capture the between-country variation in resistance

1128 frequency. The base model fit (thick grey solid line) is compared with the model fits in

1129 which parameters vary between countries (thin dashed lines).



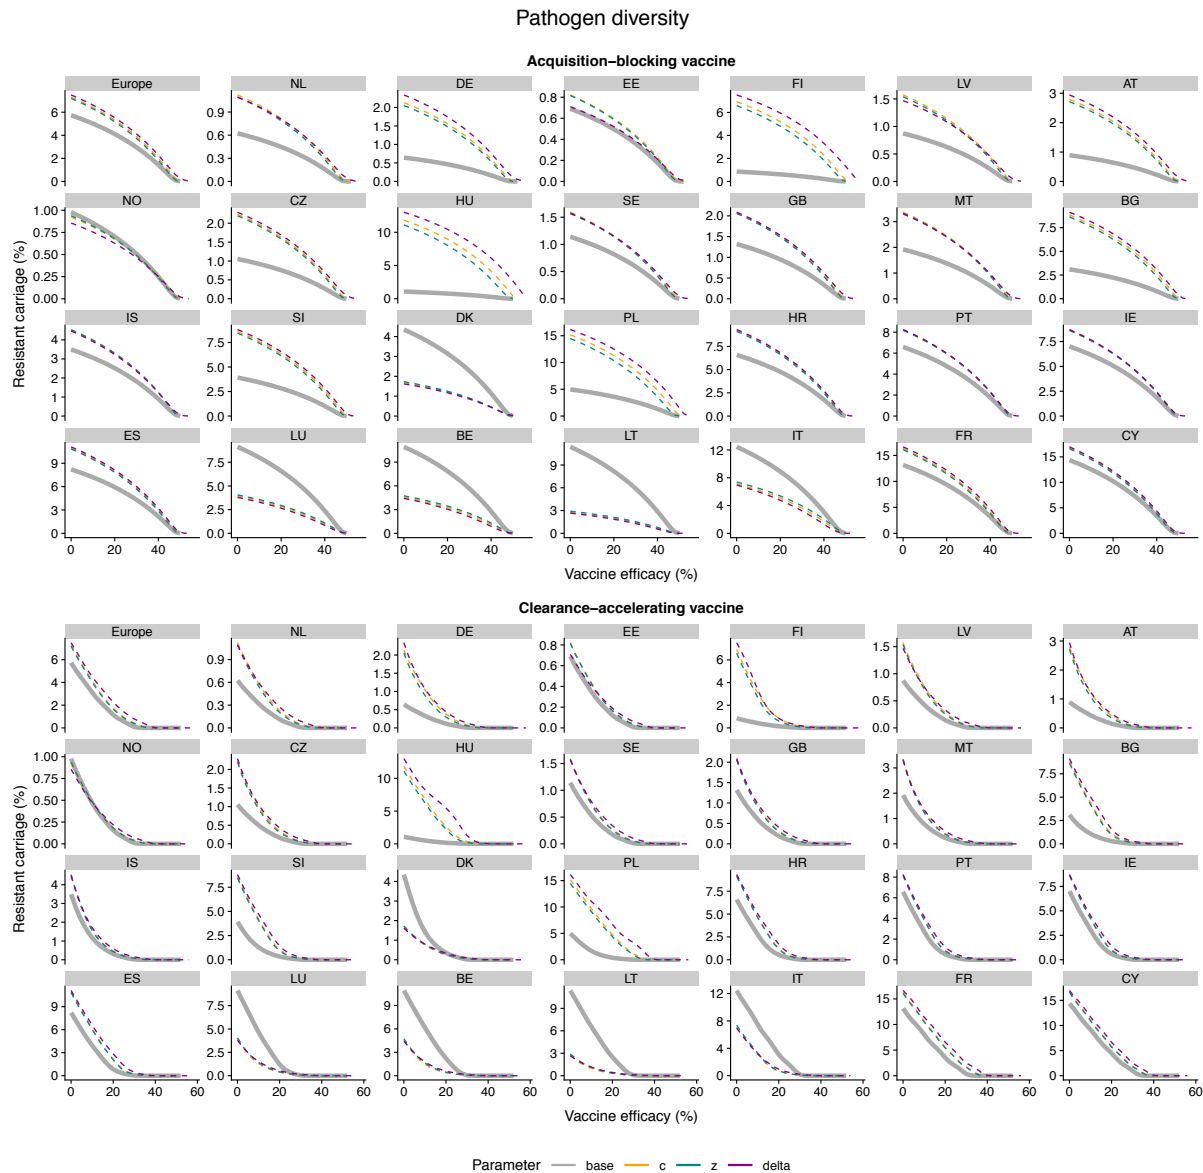

1130

1131

1132 **Supplementary Fig. 8.** Impact of vaccination under the “Pathogen diversity” model, for  
1133 those parameters able to capture the between-country variation in resistance  
1134 frequency. The base model fit (thick grey solid line) is compared with the model fits in  
1135 which parameters vary between countries (thin dashed lines).

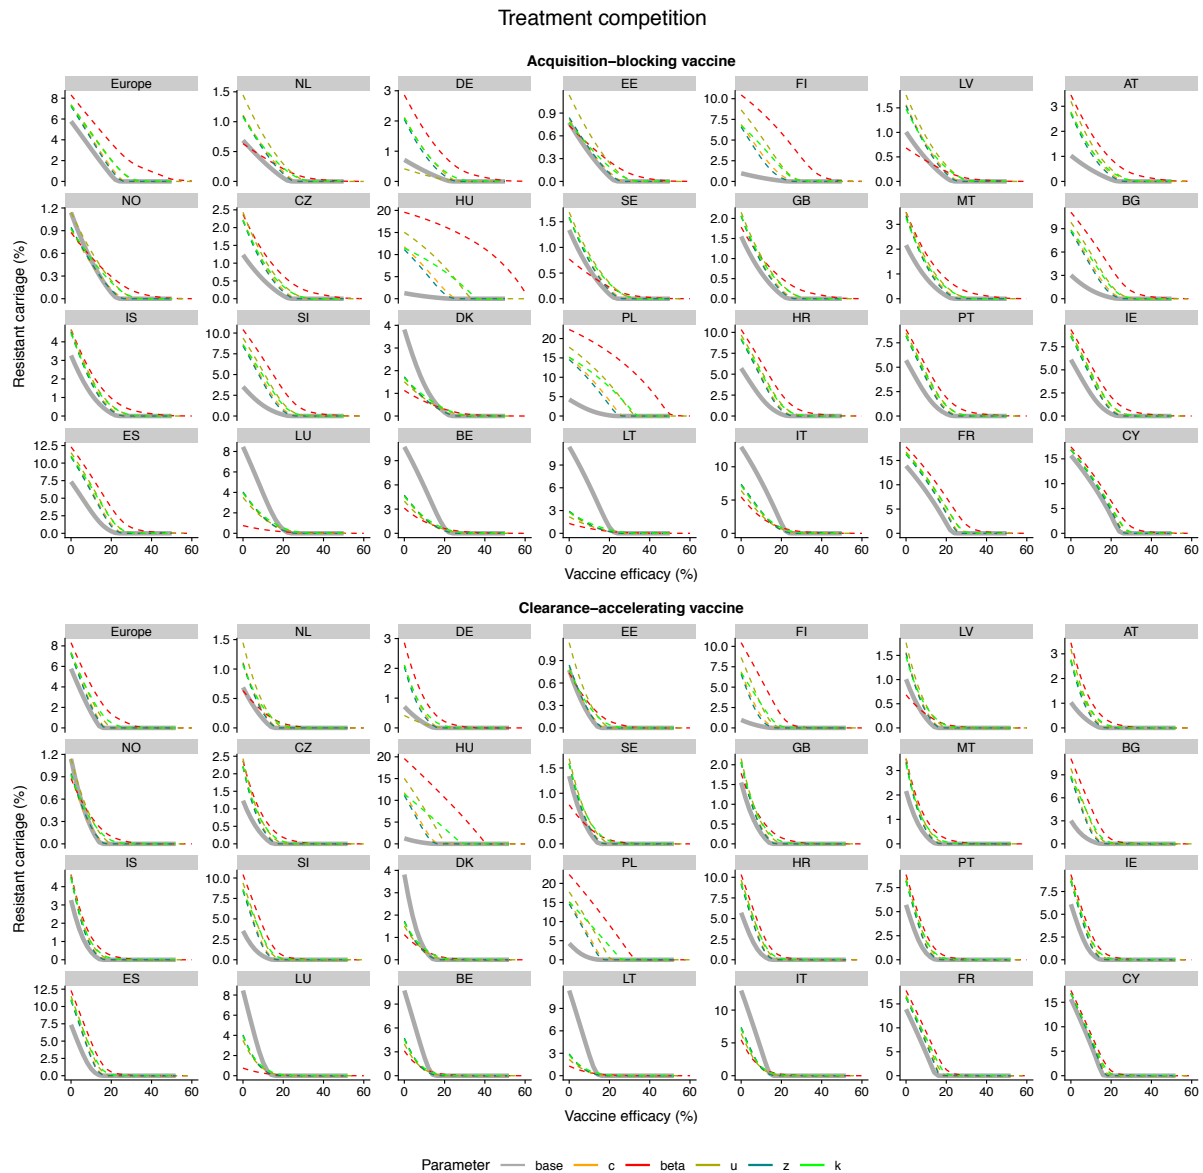

1136

1137

1138 **Supplementary Fig. 9.** Impact of vaccination under the “Treatment competition”

1139 model, for those parameters able to capture the between-country variation in resistance

1140 frequency. The base model fit (thick grey solid line) is compared with the model fits in

1141 which parameters vary between countries (thin dashed lines).

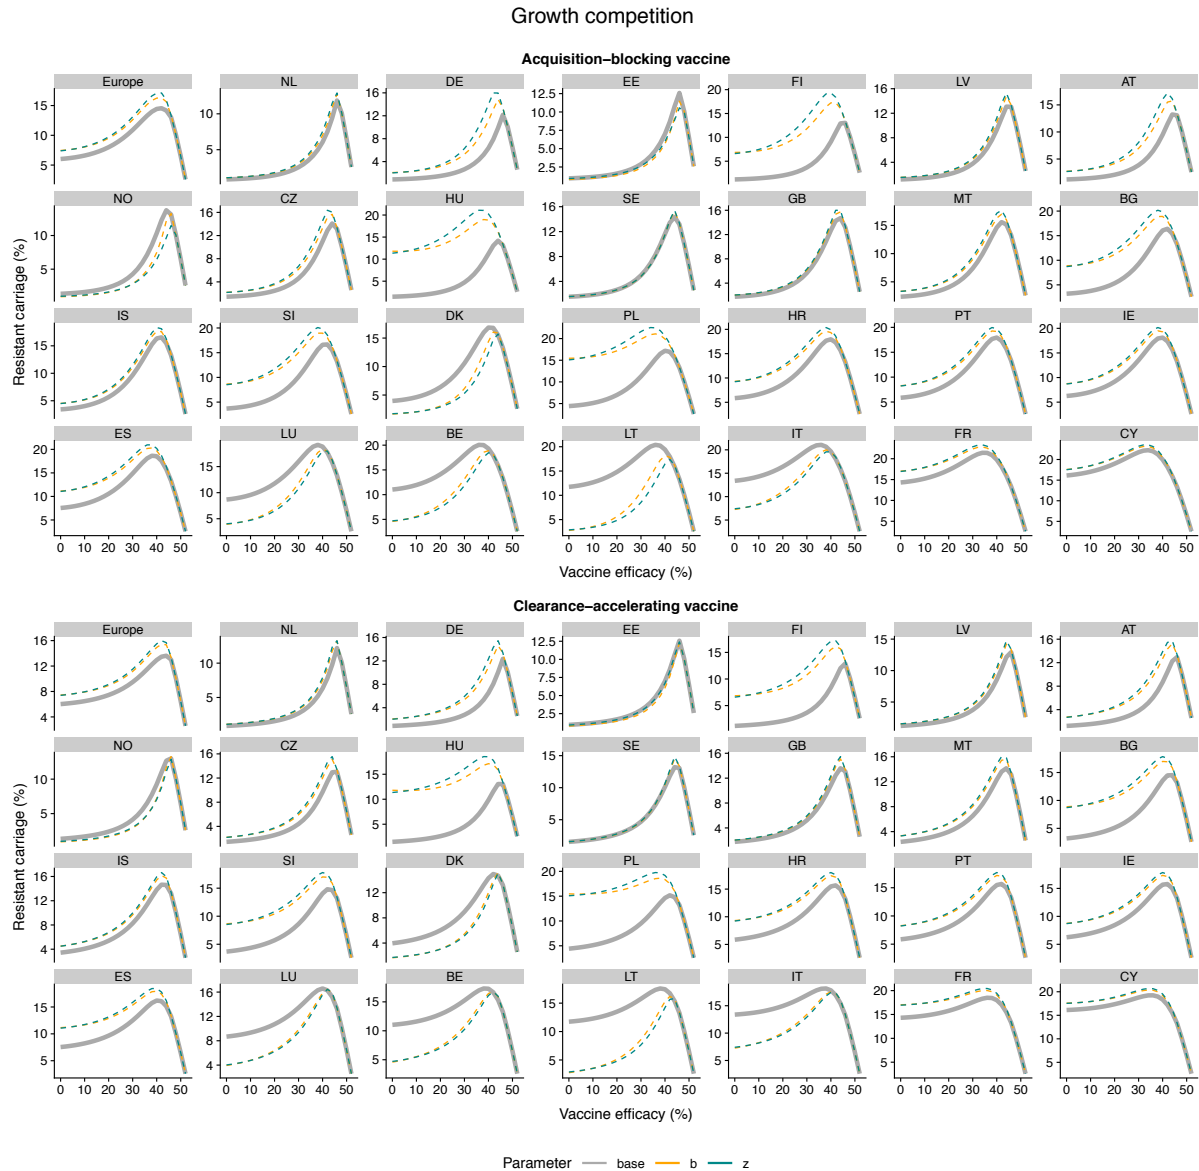

1142

1143

1144 **Supplementary Fig. 10.** Impact of vaccination under the “Growth competition” model,

1145 for those parameters able to capture the between-country variation in resistance

1146 frequency. The base model fit (thick grey solid line) is compared with the model fits in

1147 which parameters vary between countries (thin dashed lines).

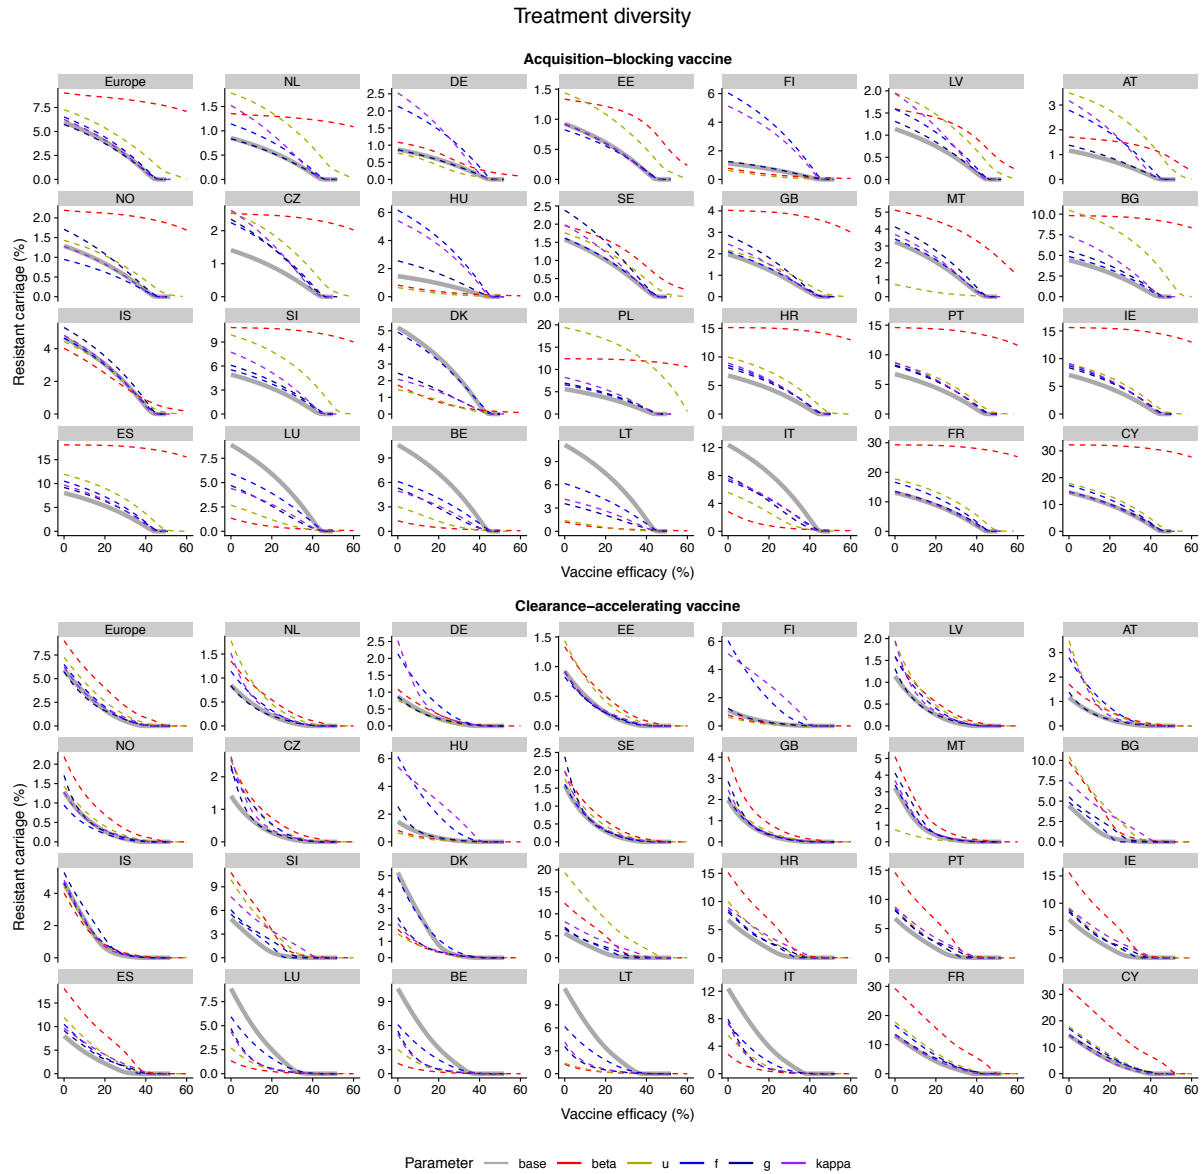

1148

1149

1150 **Supplementary Fig. 11.** Impact of vaccination under the “Treatment diversity” model,

1151 for those parameters *not* able to capture the between-country variation in resistance

1152 frequency. The base model fit (thick grey solid line) is compared with the model fits in

1153 which parameters vary between countries (thin dashed lines).

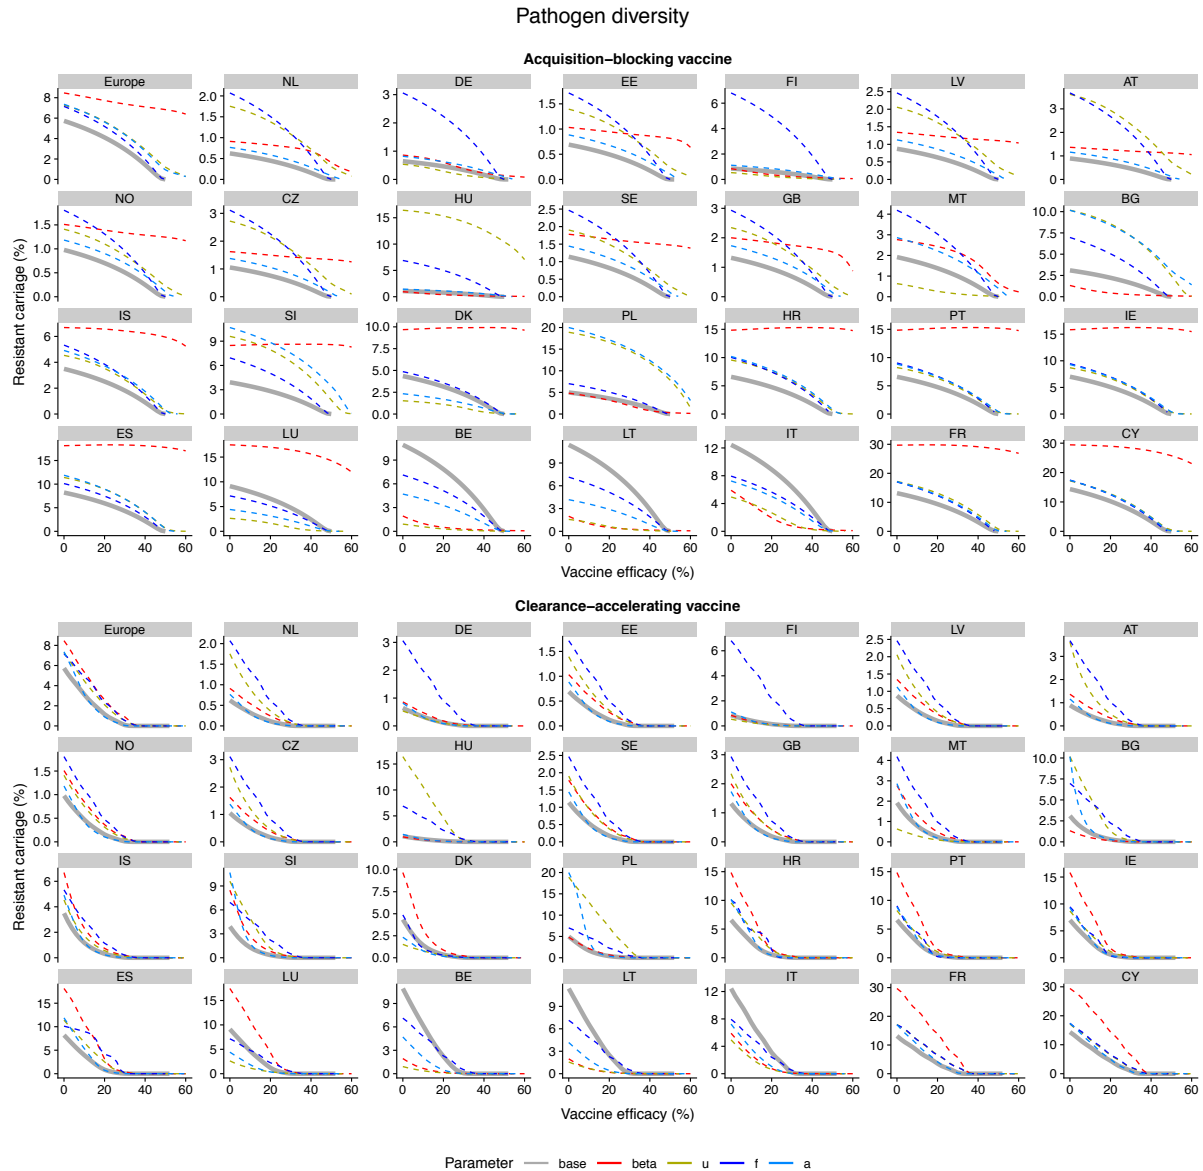

1154

1155

1156 **Supplementary Fig. 12.** Impact of vaccination under the “Pathogen diversity” model,

1157 for those parameters *not* able to capture the between-country variation in resistance

1158 frequency. The base model fit (thick grey solid line) is compared with the model fits in

1159 which parameters vary between countries (thin dashed lines).

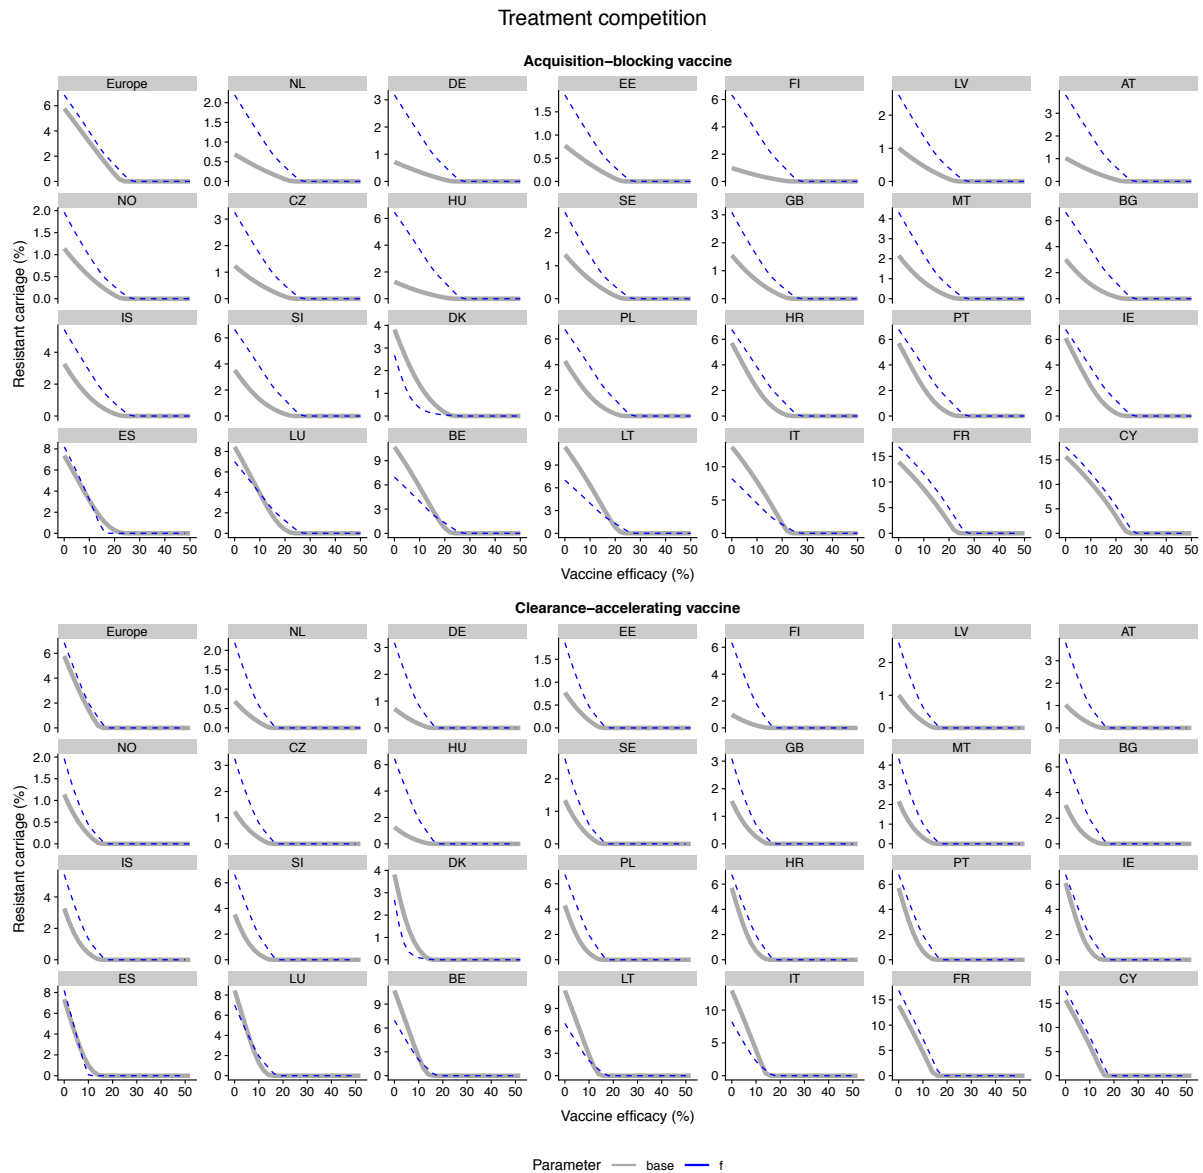

1160

1161

1162 **Supplementary Fig. 13.** Impact of vaccination under the “Treatment competition”

1163 model, for those parameters *not* able to capture the between-country variation in

1164 resistance frequency. The base model fit (thick grey solid line) is compared with the

1165 model fits in which parameters vary between countries (thin dashed lines).

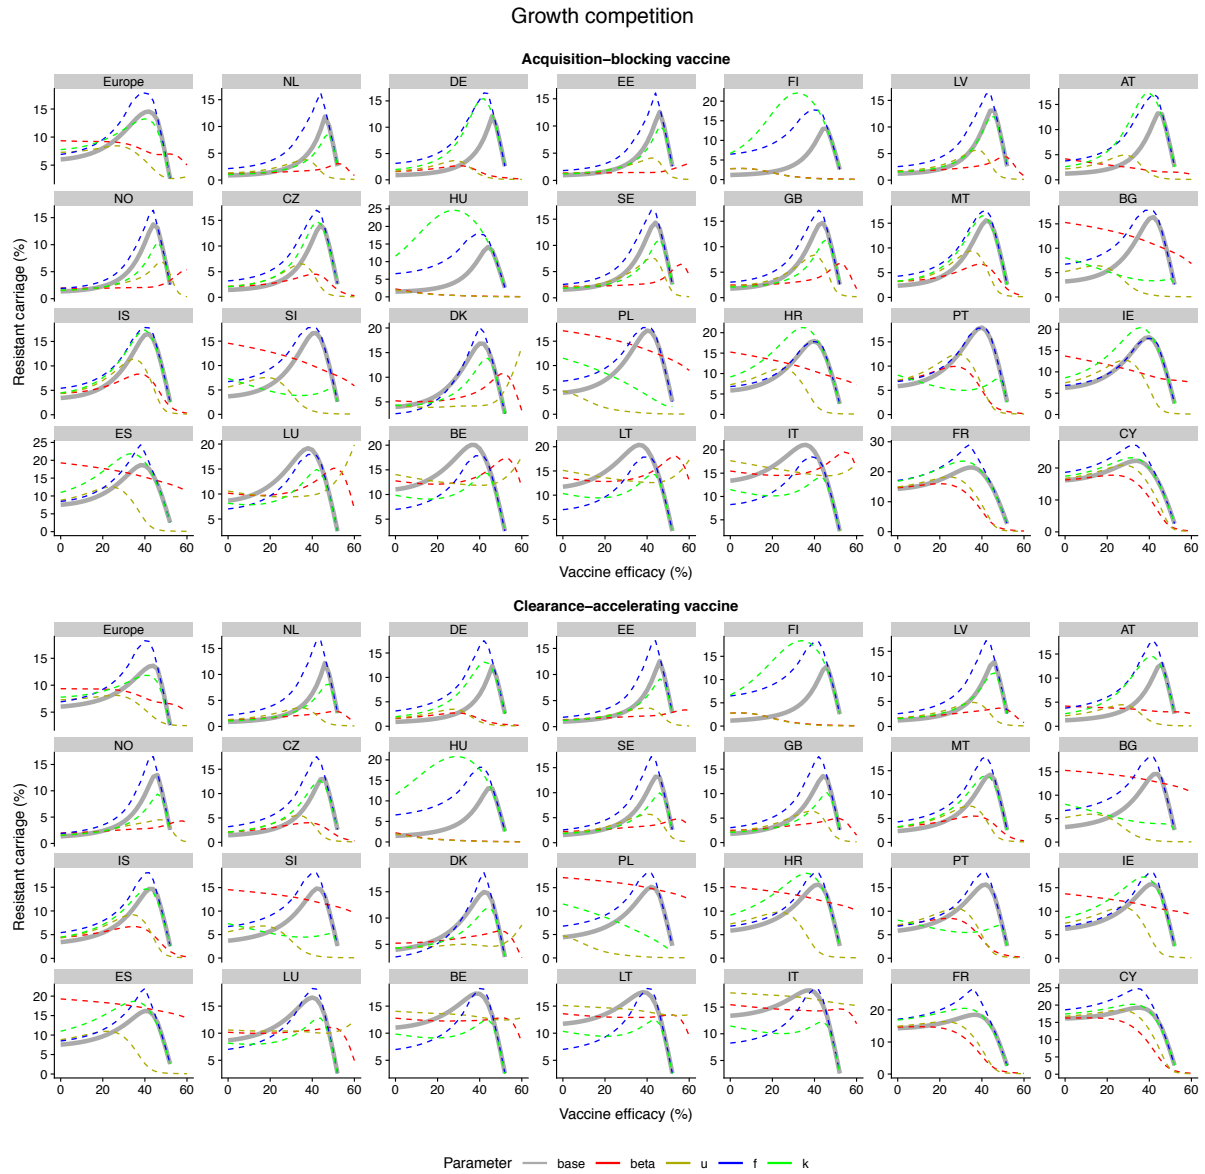

1166

1167

1168 **Supplementary Fig. 14.** Impact of vaccination under the “Growth competition” model,

1169 for those parameters *not* able to capture the between-country variation in resistance

1170 frequency. The base model fit (thick grey solid line) is compared with the model fits in

1171 which parameters vary between countries (thin dashed lines).
